# Supplementary material
Source: PubMed Central journal article supplement (PMC5527892)
Supplement: MOL2-4-135-s002.pdf [file MOL2-4-135-s002.pdf]

**Supplemental Table 5: Non-Gentropic Androgen Mediated Signaling T47D cells**

| Molecule | Gene Symbol | Entrez Gene ID | Uniprot ID | Probe Set ID | Gene Title                                                       | Fold change [TESTOBSA] vs [ctr] |
|----------|-------------|----------------|------------|--------------|------------------------------------------------------------------|---------------------------------|
| akt1     | AKT1        | 207            | P31749     | 207163_s_at  | v-akt murine thymoma viral oncogene homolog 1                    | 1.5837299                       |
| ar       | AR          | 367            | P10275     | 211621_at    | androgen receptor                                                | 1.009531                        |
|          | AR          |                |            | 211110_s_at  | androgen receptor                                                | 1.2745298                       |
| creb1    | CREB1       | 1385           | P16220     | 225572_at    | cAMP responsive element binding protein 1                        | -1.2900627                      |
|          | CREB1       |                |            | 237289_at    | cAMP responsive element binding protein 1                        | -1.1859214                      |
|          | CREB1       |                |            | 204314_s_at  | cAMP responsive element binding protein 1                        | 1.0233904                       |
|          | CREB1       |                |            | 204313_s_at  | cAMP responsive element binding protein 1                        | 1.068598                        |
|          | CREB1       |                |            | 214513_s_at  | cAMP responsive element binding protein 1                        | 1.2010753                       |
|          | CREB1       |                |            | 204312_x_at  | cAMP responsive element binding protein 1                        | 1.2107135                       |
|          | CREB1       |                |            | 225565_at    | cAMP responsive element binding protein 1                        | 1.266063                        |
| fos      | FOS         | 2353           | P01100     | 209189_at    | v-fos FBJ murine osteosarcoma viral oncogene homolog             | -1.0295045                      |
| gnrh     | GNRH1       | 2796           | P01148     | 207987_s_at  | gonadotropin-releasing hormone 1 (luteinizing-releasing hormone) | 1.0070043                       |
|          | GNRH1       |                |            | 235540_at    | gonadotropin-releasing hormone 1 (luteinizing-releasing hormone) | 1.28199                         |
| erk2     | MAPK1       | 5594           | P28482     | 229847_at    | Mitogen-activated protein kinase 1                               | -1.2273855                      |
|          | MAPK1       |                |            | 224621_at    | mitogen-activated protein kinase 1                               | -1.1163701                      |
|          | MAPK1       |                |            | 224620_at    | Mitogen-activated protein kinase 1                               | -1.0671715                      |
|          | MAPK1       |                |            | 1552263_at   | mitogen-activated protein kinase 1                               | -1.0059661                      |
|          | MAPK1       |                |            | 212271_at    | mitogen-activated protein kinase 1                               | 1.1098728                       |
|          | MAPK1       |                |            | 1552264_a_at | mitogen-activated protein kinase 1                               | 1.19231                         |
|          | MAPK1       |                |            | 208351_s_at  | mitogen-activated protein kinase 1                               | 1.3993459                       |
| fak1     | PTK2        | 5747           | Q05397     | 1559529_at   | PTK2 protein tyrosine kinase 2                                   | -1.1903038                      |
|          | PTK2        |                |            | 241453_at    | PTK2 protein tyrosine kinase 2                                   | -1.0420265                      |
|          | PTK2        |                |            | 208820_at    | PTK2 protein tyrosine kinase 2                                   | 1.0085925                       |
|          | PTK2        |                |            | 207821_s_at  | PTK2 protein tyrosine kinase 2                                   | 1.3039149                       |
| raf1     | RAF1        | 5894           | P04049     | 1557675_at   | V-raf-1 murine leukemia viral oncogene homolog 1                 | -1.0982606                      |

|       |       |       |        |              |                                                                   |            |
|-------|-------|-------|--------|--------------|-------------------------------------------------------------------|------------|
|       | RAF1  |       |        | 201244_s_at  | v-raf-1 murine leukemia viral oncogene homolog 1                  | 1.082753   |
| shbg  | SHBG  | 6462  | P04278 | 215689_s_at  | sex hormone-binding globulin                                      | -1.374677  |
| src   | SRC   | 6714  | P12931 | 221284_s_at  | v-src sarcoma (Schmidt-Ruppin A-2) viral oncogene homolog (avian) | -1.2063886 |
|       | SRC   |       |        | 1558210_at   | v-src sarcoma (Schmidt-Ruppin A-2) viral oncogene homolog (avian) | -1.1171027 |
|       | SRC   |       |        | 1565082_x_at | v-src sarcoma (Schmidt-Ruppin A-2) viral oncogene homolog (avian) | -1.0399226 |
|       | SRC   |       |        | 1558211_s_at | v-src sarcoma (Schmidt-Ruppin A-2) viral oncogene homolog (avian) | -1.0214592 |
|       | SRC   |       |        | 1565080_at   | v-src sarcoma (Schmidt-Ruppin A-2) viral oncogene homolog (avian) | -1.0178486 |
|       | SRC   |       |        | 221281_at    | v-src sarcoma (Schmidt-Ruppin A-2) viral oncogene homolog (avian) | 1.1374153  |
|       | SRC   |       |        | 213324_at    | v-src sarcoma (Schmidt-Ruppin A-2) viral oncogene homolog (avian) | 1.2910686  |
| pelp1 | PELP1 | 27043 | Q8IZL8 | 215354_s_at  | proline, glutamate and leucine rich protein 1                     | -1.0241159 |
