# Supplementary material
Source: PubMed Central journal article supplement (PMC5527892)
Supplement: MOL2-4-135-s003.pdf [file MOL2-4-135-s003.pdf]

Supplemental Table 6: Non-Gentropic Androgen Mediated Signaling MDA-MB-231 cells

| Molecule | Gene Symbol | Entrez Gene ID | Uniprot ID | Probe Set ID | Gene Title                                                       | Fold change [TESTOBSA] vs [ctr] |
|----------|-------------|----------------|------------|--------------|------------------------------------------------------------------|---------------------------------|
| akt1     | AKT1        | 207            | P31749     | 207163_s_at  | v-akt murine thymoma viral oncogene homolog 1                    | 1.1331486                       |
| ar       | AR          | 367            | P10275     | 211110_s_at  | androgen receptor                                                | -1.2624118                      |
|          | AR          |                |            | 211621_at    | androgen receptor                                                | 1.0647947                       |
| creb1    | CREB1       | 1385           | P16220     | 204312_x_at  | cAMP responsive element binding protein 1                        | 1.0300914                       |
|          | CREB1       |                |            | 204313_s_at  | cAMP responsive element binding protein 1                        | -1.2217959                      |
|          | CREB1       |                |            | 204314_s_at  | cAMP responsive element binding protein 1                        | -1.1022208                      |
|          | CREB1       |                |            | 214513_s_at  | cAMP responsive element binding protein 1                        | 1.1165727                       |
|          | CREB1       |                |            | 225565_at    | cAMP responsive element binding protein 1                        | -1.500526                       |
|          | CREB1       |                |            | 225572_at    | cAMP responsive element binding protein 1                        | -1.1089071                      |
|          | CREB1       |                |            | 237289_at    | cAMP responsive element binding protein 1                        | 1.0105646                       |
| erk2     | MAPK1       | 5594           | P28482     | 208351_s_at  | mitogen-activated protein kinase 1                               | 1.0621563                       |
|          | MAPK1       |                |            | 212271_at    | mitogen-activated protein kinase 1                               | -1.0250411                      |
|          | MAPK1       |                |            | 224620_at    | Mitogen-activated protein kinase 1                               | -1.121937                       |
|          | MAPK1       |                |            | 224621_at    | mitogen-activated protein kinase 1                               | -1.1938274                      |
|          | MAPK1       |                |            | 229847_at    | Mitogen-activated protein kinase 1                               | -1.1086978                      |
|          | MAPK1       |                |            | 1552263_at   | mitogen-activated protein kinase 1                               | 1.2406754                       |
|          | MAPK1       |                |            | 1552264_a_at | mitogen-activated protein kinase 1                               | 1.1056484                       |
| fak1     | PTK2        | 5747           | Q05397     | 207821_s_at  | PTK2 protein tyrosine kinase 2                                   | 1.1606511                       |
|          | PTK2        |                |            | 208820_at    | PTK2 protein tyrosine kinase 2                                   | 1.0514568                       |
|          | PTK2        |                |            | 241453_at    | PTK2 protein tyrosine kinase 2                                   | 1.4517127                       |
|          | PTK2        |                |            | 1559529_at   | PTK2 protein tyrosine kinase 2                                   | -1.1546309                      |
| fos      | FOS         | 2353           | P01100     | 209189_at    | v-fos FBJ murine osteosarcoma viral oncogene homolog             | 2.9446747                       |
| gnrh     | GNRH1       | 2796           | P01148     | 207987_s_at  | gonadotropin-releasing hormone 1 (luteinizing-releasing hormone) | 1.0227132                       |
|          | GNRH1       |                |            | 235540_at    | gonadotropin-releasing hormone 1 (luteinizing-releasing hormone) | -1.1412084                      |
| pelp1    | PELP1       | 27043          | Q8IZL8     | 215354_s_at  | proline, glutamate and leucine rich protein 1                    | 1.1331141                       |
| raf1     | RAF1        | 5894           | P04049     | 201244_s_at  | v-raf-1 murine leukemia viral oncogene homolog 1                 | 1.1514815                       |
|          | RAF1        |                |            | 1557675_at   | V-raf-1 murine leukemia viral oncogene homolog 1                 | -1.1522486                      |

|      |      |      |        |              |                                                                   |            |
|------|------|------|--------|--------------|-------------------------------------------------------------------|------------|
| shbg | SHBG | 6462 | P04278 | 215689_s_at  | sex hormone-binding globulin                                      | -1.2563927 |
| src  | SRC  | 6714 | P12931 | 213324_at    | v-src sarcoma (Schmidt-Ruppin A-2) viral oncogene homolog (avian) | 1.060693   |
|      | SRC  |      |        | 221281_at    | v-src sarcoma (Schmidt-Ruppin A-2) viral oncogene homolog (avian) | -1.1459785 |
|      | SRC  |      |        | 221284_s_at  | v-src sarcoma (Schmidt-Ruppin A-2) viral oncogene homolog (avian) | -1.024852  |
|      | SRC  |      |        | 1558210_at   | v-src sarcoma (Schmidt-Ruppin A-2) viral oncogene homolog (avian) | 1.1834706  |
|      | SRC  |      |        | 1558211_s_at | v-src sarcoma (Schmidt-Ruppin A-2) viral oncogene homolog (avian) | -1.4809521 |
|      | SRC  |      |        | 1565080_at   | v-src sarcoma (Schmidt-Ruppin A-2) viral oncogene homolog (avian) | 1.1388252  |
|      | SRC  |      |        | 1565082_x_at | v-src sarcoma (Schmidt-Ruppin A-2) viral oncogene homolog (avian) | -1.0444294 |
