# Supplementary material
Source: PubMed Central journal article supplement (PMC5527892)
Supplement: MOL2-4-135-s008.pdf [file MOL2-4-135-s008.pdf]

**Supplemental Table 1: Genes involved in Androgen Mediated Signaling Pathway T47D cells**

| Probe Set ID | Entrez Gene | Gene Symbol | Gene Title                                                                         | Fold change([TESTOBSA] vs [ctr]) |
|--------------|-------------|-------------|------------------------------------------------------------------------------------|----------------------------------|
| 205659_at    | 9734        | HDAC9       | histone deacetylase 9                                                              | -1.7622132                       |
| 213891_s_at  | 6925        | TCF4        | transcription factor 4                                                             | -1.181368                        |
| 201694_s_at  | 1958        | EGR1        | early growth response 1                                                            | -1.4951199                       |
| 218807_at    | 10451       | VAV3        | vav 3 guanine nucleotide exchange factor                                           | -1.2272476                       |
| 1553272_at   | 206358      | SLC36A1     | solute carrier family 36 (proton/amino acid symporter), member 1                   | -1.2509655                       |
| 218806_s_at  | 10451       | VAV3        | vav 3 guanine nucleotide exchange factor                                           | -1.1456089                       |
| 212761_at    | 6934        | TCF7L2      | transcription factor 7-like 2 (T-cell specific, HMG-box)                           | -1.4543887                       |
| 209354_at    | 8764        | TNFRSF14    | tumor necrosis factor receptor superfamily, member 14 (herpesvirus entry mediator) | -1.1874287                       |
| 212387_at    | 6925        | TCF4        | transcription factor 4                                                             | -1.2540176                       |
| 212386_at    | 6925        | TCF4        | transcription factor 4                                                             | -1.4073619                       |
| 206740_x_at  | 6847        | SYCP1       | synaptonemal complex protein 1                                                     | 1.1274607                        |
| 202401_s_at  | 6722        | SRF         | serum response factor (c-fos serum response element-binding transcription factor)  | 1.2106699                        |
| 212385_at    | 6925        | TCF4        | transcription factor 4                                                             | 1.1390281                        |
| 227957_at    | 2934        | GSN         | Gelsolin (amyloidosis, Finnish type)                                               | -1.4161222                       |
| 201693_s_at  | 1958        | EGR1        | early growth response 1                                                            | -1.3668575                       |
| 225160_x_at  | 4193        | MDM2        | Mdm2 p53 binding protein homolog (mouse)                                           | 1.0580442                        |
| 210339_s_at  | 3817        | KLK2        | kallikrein-related peptidase 2                                                     | -1.3396232                       |
| 1553529_at   | 80834       | TAS1R2      | taste receptor, type 1, member 2                                                   | -1.0768578                       |
| 209706_at    | 4824        | NKX3-1      | NK3 homeobox 1                                                                     | 1.1164159                        |
| 1555897_at   | 23028       | KDM1        | lysine (K)-specific demethylase 1                                                  | 1.0795605                        |
| 212382_at    | 6925        | TCF4        | transcription factor 4                                                             | -1.3076986                       |
| 230348_at    | 26524       | LATS2       | LATS, large tumor suppressor, homolog 2 (Drosophila)                               | 1.0691365                        |
| 227404_s_at  | 1958        | EGR1        | Early growth response 1                                                            | -1.3792672                       |
| 202630_at    | 10513       | APPBP2      | amyloid beta precursor protein (cytoplasmic tail) binding protein 2                | -1.1759733                       |
| 1558210_at   | 6714        | SRC         | v-src sarcoma (Schmidt-Ruppin A-2) viral oncogene homolog (avian)                  | -1.1171027                       |

|              |                       |                           |                                                                                 |            |
|--------------|-----------------------|---------------------------|---------------------------------------------------------------------------------|------------|
| 205991_s_at  | 5396                  | PRRX1                     | paired related homeobox 1                                                       | 1.0021275  |
| 201272_at    | 231                   | AKR1B1                    | aldo-keto reductase family 1, member B1 (aldose reductase)                      | -1.1211401 |
| 205372_at    | 5324                  | PLAG1                     | pleiomorphic adenoma gene 1                                                     | -1.0771546 |
| 209854_s_at  | 3817                  | KLK2                      | kallikrein-related peptidase 2                                                  | -1.1919341 |
| 226364_at    | 3092                  | HIP1                      | Huntingtin interacting protein 1                                                | -1.1305082 |
| 204583_x_at  | 354                   | KLK3                      | kallikrein-related peptidase 3                                                  | -1.041274  |
| 244858_at    | 100129041 ///<br>7050 | LOC100129041<br>/// TGIF1 | hypothetical protein LOC100129041 /// TGFB-induced factor homeobox 1            | -1.1049675 |
| 236094_at    | 6934                  | TCF7L2                    | Transcription factor 7-like 2 (T-cell specific, HMG-box)                        | -1.210207  |
| 207143_at    | 1021                  | CDK6                      | cyclin-dependent kinase 6                                                       | -1.0882837 |
| 214404_x_at  | 25803                 | SPDEF                     | SAM pointed domain containing ets transcription factor                          | 1.1115888  |
| 209431_s_at  | 23598                 | PATZ1                     | POZ (BTB) and AT hook containing zinc finger 1                                  | 1.010749   |
| 216037_x_at  | 6934                  | TCF7L2                    | transcription factor 7-like 2 (T-cell specific, HMG-box)                        | -1.2350131 |
| 218878_s_at  | 23411                 | SIRT1                     | sirtuin (silent mating type information regulation 2 homolog) 1 (S. cerevisiae) | -1.417657  |
| 207893_at    | 6736                  | SRY                       | sex determining region Y                                                        | -1.2225453 |
| 226335_at    | 6197                  | RPS6KA3                   | ribosomal protein S6 kinase, 90kDa, polypeptide 3                               | 1.0922391  |
| 211393_at    | 23598                 | PATZ1                     | POZ (BTB) and AT hook containing zinc finger 1                                  | 1.0046566  |
| 1565080_at   | 6714                  | SRC                       | v-src sarcoma (Schmidt-Ruppin A-2) viral oncogene homolog (avian)               | -1.0178486 |
| 229711_s_at  | 4193                  | MDM2                      | Mdm2 p53 binding protein homolog (mouse)                                        | -1.1820617 |
| 207221_at    | 9002                  | F2RL3                     | coagulation factor II (thrombin) receptor-like 3                                | -1.0806036 |
| 205385_at    | 4193                  | MDM2                      | Mdm2 p53 binding protein homolog (mouse)                                        | -1.1843323 |
| 212348_s_at  | 23028                 | KDM1                      | lysine (K)-specific demethylase 1                                               | 1.1296782  |
| 216321_s_at  | 2908                  | NR3C1                     | nuclear receptor subfamily 3, group C, member 1 (glucocorticoid receptor)       | -1.4758824 |
| 212689_s_at  | 55818                 | KDM3A                     | lysine (K)-specific demethylase 3A                                              | -1.1448283 |
| 206035_at    | 5966                  | REL                       | v-rel reticuloendotheliosis viral oncogene homolog (avian)                      | -1.2493736 |
| 1560317_s_at | 3092                  | HIP1                      | huntingtin interacting protein 1                                                | -1.1731657 |
| 220892_s_at  | 29968                 | PSAT1                     | phosphoserine aminotransferase 1                                                | -1.0342069 |

|             |               |                    |                                                                                         |            |
|-------------|---------------|--------------------|-----------------------------------------------------------------------------------------|------------|
| 204039_at   | 1050          | CEBPA              | CCAAT/enhancer binding protein (C/EBP), alpha                                           | 1.0270005  |
| 215689_s_at | 6462          | SHBG               | sex hormone-binding globulin                                                            | -1.374677  |
| 237289_at   | 1385          | CREB1              | cAMP responsive element binding protein 1                                               | -1.1859214 |
| 202400_s_at | 6722          | SRF                | serum response factor (c-fos serum response element-binding transcription factor)       | -1.0939032 |
| 213119_at   | 206358        | SLC36A1            | solute carrier family 36 (proton/amino acid symporter), member 1                        | -1.0602447 |
| 220302_at   | 4117          | MAK                | male germ cell-associated kinase                                                        | -1.10497   |
| 1559529_at  | 5747          | PTK2               | PTK2 protein tyrosine kinase 2                                                          | -1.1903038 |
| 223062_s_at | 29968         | PSAT1              | phosphoserine aminotransferase 1                                                        | -1.1055783 |
| 201654_s_at | 3339          | HSPG2              | heparan sulfate proteoglycan 2                                                          | -1.1254275 |
| 212762_s_at | 6934          | TCF7L2             | transcription factor 7-like 2 (T-cell specific, HMG-box)                                | -1.2992752 |
| 228837_at   | 6925          | TCF4               | transcription factor 4                                                                  | 1.118916   |
| 221906_at   | 114112        | TXNRD3             | thioredoxin reductase 3                                                                 | 1.0498765  |
| 221525_at   | 83637         | ZMIZ2              | zinc finger, MIZ-type containing 2                                                      | 1.1056049  |
| 214281_s_at | 25898         | RCHY1              | ring finger and CHY zinc finger domain containing 1                                     | -1.0495347 |
| 205699_at   | 5608          | MAP2K6             | mitogen-activated protein kinase kinase 6                                               | 1.0549752  |
| 229664_at   | 5599          | MAPK8              | mitogen-activated protein kinase 8                                                      | 1.0288916  |
| 218158_s_at | 26060         | APPL1              | adaptor protein, phosphotyrosine interaction, PH domain and leucine zipper containing 1 | -1.0515695 |
| 211391_s_at | 23598         | PATZ1              | POZ (BTB) and AT hook containing zinc finger 1                                          | 1.0287902  |
| 217542_at   | 4193          | MDM2               | Mdm2 p53 binding protein homolog (mouse)                                                | -1.0496783 |
| 231629_x_at | 354           | KLK3               | Kallikrein-related peptidase 3                                                          | -1.16862   |
| 201522_x_at | 6638 /// 8926 | SNRPN ///<br>SNURF | small nuclear ribonucleoprotein polypeptide N /// SNRPN upstream reading frame          | 1.0556159  |
| 207039_at   | 1029          | CDKN2A             | cyclin-dependent kinase inhibitor 2A (melanoma, p16, inhibits CDK4)                     | 1.0800894  |
| 243722_at   | 260434        | PYDC1              | PYD (pyrin domain) containing 1                                                         | -1.3749105 |
| 231289_at   | 8648          | NCOA1              | Nuclear receptor coactivator 1                                                          | -1.140602  |
| 241453_at   | 5747          | PTK2               | PTK2 protein tyrosine kinase 2                                                          | -1.0420265 |
| 213536_s_at | 7329          | UBE2I              | Ubiquitin-conjugating enzyme E2I (UBC9 homolog, yeast)                                  | -1.0697675 |
| 206689_x_at | 10524         | KAT5               | K(lysine) acetyltransferase 5                                                           | 1.1838195  |
| 215605_at   | 10499         | NCOA2              | Nuclear receptor coactivator 2                                                          | -1.0969359 |

|             |        |          |                                                                                     |            |
|-------------|--------|----------|-------------------------------------------------------------------------------------|------------|
| 203313_s_at | 7050   | TGIF1    | TGFB-induced factor homeobox 1                                                      | 1.0402296  |
| 59631_at    | 114112 | TXNRD3   | thioredoxin reductase 3                                                             | 1.1612167  |
| 208760_at   | 7329   | UBE2I    | Ubiquitin-conjugating enzyme E2I (UBC9 homolog, yeast)                              | 1.1207519  |
| 203445_s_at | 10106  | CTDSP2   | CTD (carboxy-terminal domain, RNA polymerase II, polypeptide A) small phosphatase 2 | -1.2382118 |
| 1566901_at  | 7050   | TGIF1    | TGFB-induced factor homeobox 1                                                      | 1.251798   |
| 202629_at   | 10513  | APPBP2   | amyloid beta precursor protein (cytoplasmic tail) binding protein 2                 | 1.0077441  |
| 211156_at   | 1029   | CDKN2A   | cyclin-dependent kinase inhibitor 2A (melanoma, p16, inhibits CDK4)                 | -1.0313395 |
| 213441_x_at | 25803  | SPDEF    | SAM pointed domain containing ets transcription factor                              | 1.0523823  |
| 1555545_at  | 3817   | KLK2     | kallikrein-related peptidase 2                                                      | -1.1520905 |
| 236309_x_at | 83637  | ZMIZ2    | zinc finger, MIZ-type containing 2                                                  | 1.1743954  |
| 208680_at   | 5052   | PRDX1    | peroxiredoxin 1                                                                     | 1.0023097  |
| 209115_at   | 9039   | UBA3     | ubiquitin-like modifier activating enzyme 3                                         | -1.1720363 |
| 213535_s_at | 7329   | UBE2I    | ubiquitin-conjugating enzyme E2I (UBC9 homolog, yeast)                              | 1.1254007  |
| 211689_s_at | 7113   | TMPRSS2  | transmembrane protease, serine 2                                                    | 1.1419932  |
| 220192_x_at | 25803  | SPDEF    | SAM pointed domain containing ets transcription factor                              | 1.1906639  |
| 211498_s_at | 4824   | NKX3-1   | NK3 homeobox 1                                                                      | -1.0553256 |
| 229515_at   | 5074   | PAWR     | PRKC, apoptosis, WT1, regulator                                                     | -1.0923822 |
| 207433_at   | 3586   | IL10     | interleukin 10                                                                      | 1.1635418  |
| 209651_at   | 7041   | TGFB1I1  | transforming growth factor beta 1 induced transcript 1                              | 1.0876424  |
| 1552263_at  | 5594   | MAPK1    | mitogen-activated protein kinase 1                                                  | -1.0059661 |
| 228484_s_at | 2308   | FOXO1    | Forkhead box O1                                                                     | -1.2267613 |
| 226046_at   | 5599   | MAPK8    | mitogen-activated protein kinase 8                                                  | -1.2521021 |
| 214328_s_at | 3320   | HSP90AA1 | heat shock protein 90kDa alpha (cytosolic), class A member 1                        | -1.1293676 |
| 200049_at   | 11143  | MYST2    | MYST histone acetyltransferase 2                                                    | 1.0494972  |
| 217937_s_at | 51564  | HDAC7    | histone deacetylase 7                                                               | 1.0113428  |
| 54970_at    | 83637  | ZMIZ2    | zinc finger, MIZ-type containing 2                                                  | -1.111253  |

|             |       |        |                                                                                     |            |
|-------------|-------|--------|-------------------------------------------------------------------------------------|------------|
| 211733_x_at | 6342  | SCP2   | sterol carrier protein 2                                                            | -1.1378834 |
| 201209_at   | 3065  | HDAC1  | histone deacetylase 1                                                               | 1.1176401  |
| 212881_at   | 51588 | PIAS4  | protein inhibitor of activated STAT, 4                                              | -1.011975  |
| 217844_at   | 58190 | CTDSP1 | CTD (carboxy-terminal domain, RNA polymerase II, polypeptide A) small phosphatase 1 | 1.0080719  |
| 1552758_at  | 9734  | HDAC9  | histone deacetylase 9                                                               | -1.0753318 |
| 203753_at   | 6925  | TCF4   | transcription factor 4                                                              | 1.0784813  |
| 202326_at   | 10919 | EHMT2  | euchromatic histone-lysine N-methyltransferase 2                                    | 1.4305274  |
| 209494_s_at | 23598 | PATZ1  | POZ (BTB) and AT hook containing zinc finger 1                                      | 1.1154649  |
| 209844_at   | 10481 | HOXB13 | homeobox B13                                                                        | 1.0102463  |
| 244385_at   | 23081 | KDM4C  | Lysine (K)-specific demethylase 4C                                                  | -1.1561439 |
| 208820_at   | 5747  | PTK2   | PTK2 protein tyrosine kinase 2                                                      | 1.0085925  |
| 215402_at   | 10513 | APPBP2 | amyloid beta precursor protein (cytoplasmic tail) binding protein 2                 | -1.00509   |
| 228342_s_at | 57538 | ALPK3  | alpha-kinase 3                                                                      | 1.0185131  |
| 209189_at   | 2353  | FOS    | v-fos FBJ murine osteosarcoma viral oncogene homolog                                | -1.0295045 |
| 221281_at   | 6714  | SRC    | v-src sarcoma (Schmidt-Ruppin A-2) viral oncogene homolog (avian)                   | 1.1374153  |
| 214047_s_at | 8930  | MBD4   | methyl-CpG binding domain protein 4                                                 | -1.0357544 |
| 201244_s_at | 5894  | RAF1   | v-raf-1 murine leukemia viral oncogene homolog 1                                    | 1.082753   |
| 234393_at   | 9734  | HDAC9  | histone deacetylase 9                                                               | 1.0296928  |
| 1552760_at  | 9734  | HDAC9  | histone deacetylase 9                                                               | -1.2195429 |
| 213442_x_at | 25803 | SPDEF  | SAM pointed domain containing ets transcription factor                              | -1.1287582 |
| 203110_at   | 2185  | PTK2B  | PTK2B protein tyrosine kinase 2 beta                                                | 1.0312179  |
| 203111_s_at | 2185  | PTK2B  | PTK2B protein tyrosine kinase 2 beta                                                | -1.0962472 |
| 227013_at   | 26524 | LATS2  | LATS, large tumor suppressor, homolog 2 (Drosophila)                                | -1.0786225 |
| 209855_s_at | 3817  | KLK2   | kallikrein-related peptidase 2                                                      | -1.3153344 |
| 209984_at   | 23081 | KDM4C  | lysine (K)-specific demethylase 4C                                                  | 1.0828124  |
| 207954_at   | 2624  | GATA2  | GATA binding protein 2                                                              | -1.1134421 |
| 1557675_at  | 5894  | RAF1   | V-raf-1 murine leukemia viral oncogene homolog 1                                    | -1.0982606 |
| 206546_at   | 10388 | SYCP2  | synaptonemal complex protein 2                                                      | -1.1594847 |
| 214258_x_at | 10524 | KAT5   | K(lysine) acetyltransferase 5                                                       | 1.1517624  |

|             |       |          |                                                                           |            |
|-------------|-------|----------|---------------------------------------------------------------------------|------------|
| 235300_x_at | 25898 | RCHY1    | ring finger and CHY zinc finger domain containing 1                       | -1.2226516 |
| 208979_at   | 23054 | NCOA6    | nuclear receptor coactivator 6                                            | 1.0848012  |
| 210530_s_at | 7181  | NR2C1    | nuclear receptor subfamily 2, group C, member 1                           | 1.0155948  |
| 216035_x_at | 6934  | TCF7L2   | transcription factor 7-like 2 (T-cell specific, HMG-box)                  | -1.1440461 |
| 210211_s_at | 3320  | HSP90AA1 | heat shock protein 90kDa alpha (cytosolic), class A member 1              | -1.1020671 |
| 233060_at   | 57178 | ZMIZ1    | zinc finger, MIZ-type containing 1                                        | -1.460006  |
| 210531_at   | 7181  | NR2C1    | nuclear receptor subfamily 2, group C, member 1                           | -1.1055943 |
| 201865_x_at | 2908  | NR3C1    | nuclear receptor subfamily 3, group C, member 1 (glucocorticoid receptor) | -1.2974552 |
| 237920_at   | 10388 | SYCP2    | Synaptonemal complex protein 2                                            | -1.0455352 |
| 1560303_at  | 2288  | FKBP4    | FK506 binding protein 4, 59kDa                                            | 1.6659266  |
| 225572_at   | 1385  | CREB1    | cAMP responsive element binding protein 1                                 | -1.2900627 |
| 236326_at   | 51564 | HDAC7    | histone deacetylase 7                                                     | 1.1075935  |
| 227958_s_at | 2934  | GSN      | Gelsolin (amyloidosis, Finnish type)                                      | -1.169562  |
| 206645_s_at | 190   | NROB1    | nuclear receptor subfamily 0, group B, member 1                           | -1.0213437 |
| 209192_x_at | 10524 | KAT5     | K(lysine) acetyltransferase 5                                             | 1.2041291  |
| 200651_at   | 10399 | GNB2L1   | guanine nucleotide binding protein (G protein), beta polypeptide 2-like 1 | 1.098952   |
| 1570433_at  | 7113  | TMPRSS2  | transmembrane protease, serine 2                                          | -1.0150559 |
| 214280_x_at | 3178  | HNRNPA1  | heterogeneous nuclear ribonucleoprotein A1                                | 1.0980792  |
| 224221_s_at | 10451 | VAV3     | vav 3 guanine nucleotide exchange factor                                  | 1.0462337  |
| 242758_x_at | 55818 | KDM3A    | lysine (K)-specific demethylase 3A                                        | -1.0352675 |
| 230105_at   | 10481 | HOXB13   | homeobox B13                                                              | -1.0034937 |
| 211671_s_at | 2908  | NR3C1    | nuclear receptor subfamily 3, group C, member 1 (glucocorticoid receptor) | -1.2348523 |
| 214861_at   | 23081 | KDM4C    | lysine (K)-specific demethylase 4C                                        | 1.0407295  |
| 203266_s_at | 6416  | MAP2K4   | mitogen-activated protein kinase kinase 4                                 | 1.0748416  |
| 214846_s_at | 57538 | ALPK3    | alpha-kinase 3                                                            | -1.0155442 |
| 204582_s_at | 354   | KLK3     | kallikrein-related peptidase 3                                            | 1.0526522  |
| 212759_s_at | 6934  | TCF7L2   | transcription factor 7-like 2 (T-cell specific, HMG-box)                  | -1.1685462 |
| 204005_s_at | 5074  | PAWR     | PRKC, apoptosis, WT1, regulator                                           | -1.2969321 |
| 222146_s_at | 6925  | TCF4     | transcription factor 4                                                    | 1.0436579  |

|             |               |                    |                                                                                                   |            |
|-------------|---------------|--------------------|---------------------------------------------------------------------------------------------------|------------|
| 205102_at   | 7113          | TMPRSS2            | transmembrane protease, serine 2                                                                  | 1.1633718  |
| 211851_x_at | 672           | BRCA1              | breast cancer 1, early onset                                                                      | 1.1439137  |
| 203843_at   | 6197          | RPS6KA3            | ribosomal protein S6 kinase, 90kDa, polypeptide 3                                                 | 1.0526704  |
| 209580_s_at | 8930          | MBD4               | methyl-CpG binding domain protein 4                                                               | 1.1441044  |
| 224621_at   | 5594          | MAPK1              | mitogen-activated protein kinase 1                                                                | -1.1163701 |
| 205593_s_at | 5152          | PDE9A              | phosphodiesterase 9A                                                                              | 1.0425532  |
| 200016_x_at | 3178          | HNRNPA1            | heterogeneous nuclear ribonucleoprotein A1                                                        | -1.0037843 |
| 239585_at   | 8850          | KAT2B              | K(lysine) acetyltransferase 2B                                                                    | 1.0417186  |
| 226695_at   | 5396          | PRRX1              | paired related homeobox 1                                                                         | -1.0632293 |
| 214403_x_at | 25803         | SPDEF              | SAM pointed domain containing ets transcription factor                                            | -1.0846797 |
| 1568874_at  | 23054         | NCOA6              | nuclear receptor coactivator 6                                                                    | 1.2522537  |
| 213281_at   | 3725          | JUN                | Jun oncogene                                                                                      | 1.161861   |
| 237139_at   | 5152          | PDE9A              | phosphodiesterase 9A                                                                              | 1.0380837  |
| 209106_at   | 8648          | NCOA1              | nuclear receptor coactivator 1                                                                    | 1.0845438  |
| 205698_s_at | 5608          | MAP2K6             | mitogen-activated protein kinase kinase 6                                                         | 1.0076262  |
| 203497_at   | 5469          | MED1               | mediator complex subunit 1                                                                        | 1.005652   |
| 200696_s_at | 2934          | GSN                | gelsolin (amyloidosis, Finnish type)                                                              | 1.1364063  |
| 229956_at   | 7181          | NR2C1              | nuclear receptor subfamily 2, group C, member 1                                                   | -1.1399255 |
| 216917_s_at | 6847          | SYCP1              | synaptonemal complex protein 1                                                                    | 1.076447   |
| 208735_s_at | 10106         | CTDSP2             | CTD (carboxy-terminal domain, RNA polymerase II, polypeptide A) small phosphatase 2               | -1.0218228 |
| 233360_at   | 7329          | UBE2I              | ubiquitin-conjugating enzyme E2I (UBC9 homolog, yeast)                                            | 1.0274606  |
| 200895_s_at | 2288          | FKBP4              | FK506 binding protein 4, 59kDa                                                                    | 1.1801387  |
| 206042_x_at | 6638 /// 8926 | SNRPN ///<br>SNURF | small nuclear ribonucleoprotein polypeptide N /// SNRPN<br>upstream reading frame                 | 1.1842704  |
| 204531_s_at | 672           | BRCA1              | breast cancer 1, early onset                                                                      | -1.0825683 |
| 201074_at   | 6599          | SMARCC1            | SWI/SNF related, matrix associated, actin dependent regulator of chromatin, subfamily c, member 1 | 1.1043351  |
| 204313_s_at | 1385          | CREB1              | cAMP responsive element binding protein 1                                                         | 1.068598   |
| 200880_at   | 3301          | DNAJA1             | DnaJ (Hsp40) homolog, subfamily A, member 1                                                       | 1.1721184  |
| 206644_at   | 190           | NROB1              | nuclear receptor subfamily 0, group B, member 1                                                   | 1.1030253  |
| 207821_s_at | 5747          | PTK2               | PTK2 protein tyrosine kinase 2                                                                    | 1.3039149  |

|             |                        |                           |                                                                           |            |
|-------------|------------------------|---------------------------|---------------------------------------------------------------------------|------------|
| 211621_at   | 367                    | AR                        | androgen receptor                                                         | 1.009531   |
| 205386_s_at | 4193                   | MDM2                      | Mdm2 p53 binding protein homolog (mouse)                                  | -1.1392769 |
| 203265_s_at | 6416                   | MAP2K4                    | mitogen-activated protein kinase kinase 4                                 | 1.0815423  |
| 210774_s_at | 8031                   | NCOA4                     | nuclear receptor coactivator 4                                            | 1.042464   |
| 201866_s_at | 2908                   | NR3C1                     | nuclear receptor subfamily 3, group C, member 1 (glucocorticoid receptor) | -1.1257434 |
| 223380_s_at | 26524                  | LATS2                     | LATS, large tumor suppressor, homolog 2 (Drosophila)                      | -1.0934681 |
| 203845_at   | 8850                   | KAT2B                     | K(lysine) acetyltransferase 2B                                            | -1.2272646 |
| 213301_x_at | 8805                   | TRIM24                    | tripartite motif-containing 24                                            | 1.0003048  |
| 204391_x_at | 8805                   | TRIM24                    | tripartite motif-containing 24                                            | 1.0099635  |
| 226619_at   | 29843                  | SENP1                     | SUMO1/sentrin specific peptidase 1                                        | 1.2180437  |
| 225452_at   | 5469                   | MED1                      | mediator complex subunit 1                                                | 1.0775143  |
| 211497_x_at | 4824                   | NKX3-1                    | NK3 homeobox 1                                                            | -1.0808597 |
| 223379_s_at | 26524                  | LATS2                     | LATS, large tumor suppressor, homolog 2 (Drosophila)                      | -1.0231872 |
| 212749_s_at | 25898                  | RCHY1                     | ring finger and CHY zinc finger domain containing 1                       | 1.1015987  |
| 221919_at   | 3178 ///<br>728844     | HNRNPA1 ///<br>LOC728844  | heterogeneous nuclear ribonucleoprotein A1 ///<br>hypothetical LOC728844  | -1.0421047 |
| 212743_at   | 25898                  | RCHY1                     | ring finger and CHY zinc finger domain containing 1                       | 1.1419177  |
| 205732_s_at | 10499                  | NCOA2                     | nuclear receptor coactivator 2                                            | 1.0413772  |
| 224620_at   | 5594                   | MAPK1                     | Mitogen-activated protein kinase 1                                        | -1.0671715 |
| 200881_s_at | 3301                   | DNAJA1                    | DnaJ (Hsp40) homolog, subfamily A, member 1                               | 1.2836148  |
| 211969_at   | 3320                   | HSP90AA1                  | heat shock protein 90kDa alpha (cytosolic), class A member 1              | 1.0128618  |
| 212879_x_at | 100134427 ///<br>51588 | LOC100134427<br>/// PIAS4 | similar to PIAS4 protein /// protein inhibitor of activated STAT, 4       | 1.1943535  |
| 225456_at   | 5469                   | MED1                      | mediator complex subunit 1                                                | 1.05848    |
| 231198_at   | 1021                   | CDK6                      | cyclin-dependent kinase 6                                                 | -1.2207727 |
| 204791_at   | 7181                   | NR2C1                     | nuclear receptor subfamily 2, group C, member 1                           | 1.1717048  |
| 222034_at   | 10399                  | GNB2L1                    | Guanine nucleotide binding protein (G protein), beta polypeptide 2-like 1 | 1.1811576  |
| 216511_s_at | 6934                   | TCF7L2                    | transcription factor 7-like 2 (T-cell specific, HMG-box)                  | 1.0313464  |
| 204314_s_at | 1385                   | CREB1                     | cAMP responsive element binding protein 1                                 | 1.0233904  |



|              |                    |                          |                                                                                   |            |
|--------------|--------------------|--------------------------|-----------------------------------------------------------------------------------|------------|
| 209710_at    | 2624               | GATA2                    | GATA binding protein 2                                                            | -1.0865287 |
| 217864_s_at  | 8554               | PIAS1                    | protein inhibitor of activated STAT, 1                                            | -1.0529786 |
| 1556493_a_at | 23081              | KDM4C                    | lysine (K)-specific demethylase 4C                                                | -1.140443  |
| 206036_s_at  | 5966               | REL                      | v-rel reticuloendotheliosis viral oncogene homolog (avian)                        | 1.0811294  |
| 203521_s_at  | 24149              | ZNF318                   | zinc finger protein 318                                                           | 1.1058282  |
| 217863_at    | 8554               | PIAS1                    | protein inhibitor of activated STAT, 1                                            | -1.292293  |
| 209644_x_at  | 1029               | CDKN2A                   | cyclin-dependent kinase inhibitor 2A (melanoma, p16, inhibits CDK4)               | 1.2140598  |
| 207907_at    | 8740               | TNFSF14                  | tumor necrosis factor (ligand) superfamily, member 14                             | -1.2174114 |
| 210249_s_at  | 8648               | NCOA1                    | nuclear receptor coactivator 1                                                    | 1.2655433  |
| 222040_at    | 3178 ///<br>728844 | HNRNPA1 ///<br>LOC728844 | heterogeneous nuclear ribonucleoprotein A1 ///<br>hypothetical LOC728844          | 1.2015101  |
| 215564_at    | 374                | AREG                     | Amphiregulin                                                                      | 1.0388255  |
| 212124_at    | 57178              | ZMIZ1                    | zinc finger, MIZ-type containing 1                                                | 1.6023604  |
| 1558088_a_at | 7329               | UBE2I                    | ubiquitin-conjugating enzyme E2I (UBC9 homolog, yeast)                            | 1.0272666  |
| 212271_at    | 5594               | MAPK1                    | mitogen-activated protein kinase 1                                                | 1.1098728  |
| 229847_at    | 5594               | MAPK1                    | Mitogen-activated protein kinase 1                                                | -1.2273855 |
| 209105_at    | 8648               | NCOA1                    | nuclear receptor coactivator 1                                                    | 1.2187158  |
| 244616_x_at  | 4193               | MDM2                     | Mdm2 p53 binding protein homolog (mouse)                                          | 1.0592115  |
| 215354_s_at  | 27043              | PELP1                    | proline, glutamate and leucine rich protein 1                                     | -1.0241159 |
| 226048_at    | 5599               | MAPK8                    | mitogen-activated protein kinase 8                                                | 1.0859283  |
| 204004_at    | 5074               | PAWR                     | PRKC, apoptosis, WT1, regulator                                                   | 1.1415366  |
| 212512_s_at  | 10498              | CARM1                    | coactivator-associated arginine methyltransferase 1                               | 1.212138   |
| 210581_x_at  | 23598              | PATZ1                    | POZ (BTB) and AT hook containing zinc finger 1                                    | -1.1232564 |
| 202565_s_at  | 6840               | SVIL                     | supervillin                                                                       | 1.1968403  |
| 225477_s_at  | 7182               | NR2C2                    | nuclear receptor subfamily 2, group C, member 2                                   | -1.2888047 |
| 216422_at    | 5036 ///<br>647033 | PA2G4 ///<br>PA2G4P4     | proliferation-associated 2G4, 38kDa /// proliferation-associated 2G4 pseudogene 4 | 1.0554376  |
| 243000_at    | 1021               | CDK6                     | cyclin-dependent kinase 6                                                         | -1.0868566 |
| 1565082_x_at | 6714               | SRC                      | v-src sarcoma (Schmidt-Ruppin A-2) viral oncogene homolog (avian)                 | -1.0399226 |

|              |       |        |                                                                     |            |
|--------------|-------|--------|---------------------------------------------------------------------|------------|
| 211008_s_at  | 7329  | UBE2I  | ubiquitin-conjugating enzyme E2I (UBC9 homolog, yeast)              | 1.2422445  |
| 202631_s_at  | 10513 | APPBP2 | amyloid beta precursor protein (cytoplasmic tail) binding protein 2 | 1.1116219  |
| 202161_at    | 5585  | PKN1   | protein kinase N1                                                   | 1.3376235  |
| 214237_x_at  | 5074  | PAWR   | PRKC, apoptosis, WT1, regulator                                     | -1.1717339 |
| 231388_at    | 24149 | ZNF318 | Zinc finger protein 318                                             | 1.4375751  |
| 202566_s_at  | 6840  | SVIL   | supervillin                                                         | 1.2695615  |
| 217634_at    | 6840  | SVIL   | supervillin                                                         | 1.0478498  |
| 201455_s_at  | 9520  | NPEPPS | aminopeptidase puromycin sensitive                                  | 1.185805   |
| 221924_at    | 83637 | ZMIZ2  | zinc finger, MIZ-type containing 2                                  | 1.0124605  |
| 237891_at    | 4193  | MDM2   | Mdm2 p53 binding protein homolog (mouse)                            | 1.1885153  |
| 209107_x_at  | 8648  | NCOA1  | nuclear receptor coactivator 1                                      | 1.272025   |
| 212696_s_at  | 6047  | RNF4   | ring finger protein 4                                               | 1.2482082  |
| 1558211_s_at | 6714  | SRC    | v-src sarcoma (Schmidt-Ruppin A-2) viral oncogene homolog (avian)   | -1.0214592 |
| 202724_s_at  | 2308  | FOXO1  | forkhead box O1                                                     | 1.1589878  |
| 207484_s_at  | 10919 | EHMT2  | euchromatic histone-lysine N-methyltransferase 2                    | 1.0921797  |
| 203520_s_at  | 24149 | ZNF318 | zinc finger protein 318                                             | 1.2870775  |
| 210477_x_at  | 5599  | MAPK8  | mitogen-activated protein kinase 8                                  | -1.0834829 |
| 1555315_a_at | 4117  | MAK    | male germ cell-associated kinase                                    | 1.344904   |
| 235287_at    | 1021  | CDK6   | cyclin-dependent kinase 6                                           | 1.0806341  |
| 201655_s_at  | 3339  | HSPG2  | heparan sulfate proteoglycan 2                                      | 1.1709305  |
| 201339_s_at  | 6342  | SCP2   | sterol carrier protein 2                                            | 1.1733316  |
| 225565_at    | 1385  | CREB1  | cAMP responsive element binding protein 1                           | 1.266063   |
| 205239_at    | 374   | AREG   | amphiregulin                                                        | 1.2023149  |
| 200894_s_at  | 2288  | FKBP4  | FK506 binding protein 4, 59kDa                                      | 1.776055   |
| 209579_s_at  | 8930  | MBD4   | methyl-CpG binding domain protein 4                                 | 1.1574233  |
| 214513_s_at  | 1385  | CREB1  | cAMP responsive element binding protein 1                           | 1.2010753  |
| 207808_s_at  | 5627  | PROS1  | protein S (alpha)                                                   | -1.0060841 |
| 213324_at    | 6714  | SRC    | v-src sarcoma (Schmidt-Ruppin A-2) viral oncogene homolog (avian)   | 1.2910686  |
| 235540_at    | 2796  | GNRH1  | gonadotropin-releasing hormone 1 (luteinizing-releasing hormone)    | 1.28199    |
| 210358_x_at  | 2624  | GATA2  | GATA binding protein 2                                              | 1.3303274  |

|              |       |          |                                                                                                   |            |
|--------------|-------|----------|---------------------------------------------------------------------------------------------------|------------|
| 205426_s_at  | 3092  | HIP1     | huntingtin interacting protein 1                                                                  | 1.0161785  |
| 214048_at    | 8930  | MBD4     | methyl-CpG binding domain protein 4                                                               | 1.0870463  |
| 208676_s_at  | 5036  | PA2G4    | proliferation-associated 2G4, 38kDa                                                               | 1.4637356  |
| 214794_at    | 5036  | PA2G4    | proliferation-associated 2G4, 38kDa                                                               | 1.203141   |
| 229079_at    | 10919 | EHMT2    | Euchromatic histone-lysine N-methyltransferase 2                                                  | -1.0696673 |
| 211110_s_at  | 367   | AR       | androgen receptor                                                                                 | 1.2745298  |
| 211392_s_at  | 23598 | PATZ1    | POZ (BTB) and AT hook containing zinc finger 1                                                    | 1.3277247  |
| 1552264_a_at | 5594  | MAPK1    | mitogen-activated protein kinase 1                                                                | 1.19231    |
| 201454_s_at  | 9520  | NPEPPS   | aminopeptidase puromycin sensitive                                                                | 1.3780528  |
| 207163_s_at  | 207   | AKT1     | v-akt murine thymoma viral oncogene homolog 1                                                     | 1.5837299  |
| 211968_s_at  | 3320  | HSP90AA1 | heat shock protein 90kDa alpha (cytosolic), class A member 1                                      | 1.1134412  |
| 201075_s_at  | 6599  | SMARCC1  | SWI/SNF related, matrix associated, actin dependent regulator of chromatin, subfamily c, member 1 | 1.3115585  |
| 1560305_x_at | 2288  | FKBP4    | FK506 binding protein 4, 59kDa                                                                    | 2.1022646  |
| 221284_s_at  | 6714  | SRC      | v-src sarcoma (Schmidt-Ruppin A-2) viral oncogene homolog (avian)                                 | -1.2063886 |
| 203496_s_at  | 5469  | MED1     | mediator complex subunit 1                                                                        | 1.1599907  |
| 207987_s_at  | 2796  | GNRH1    | gonadotropin-releasing hormone 1 (luteinizing-releasing hormone)                                  | 1.0070043  |
| 203035_s_at  | 10401 | PIAS3    | protein inhibitor of activated STAT, 3                                                            | 1.1701288  |
| 202723_s_at  | 2308  | FOXO1    | forkhead box O1                                                                                   | 1.0398659  |
| 202949_s_at  | 2274  | FHL2     | four and a half LIM domains 2                                                                     | 1.9924455  |
| 202599_s_at  | 8204  | NRIP1    | nuclear receptor interacting protein 1                                                            | 1.6840534  |
| 204312_x_at  | 1385  | CREB1    | cAMP responsive element binding protein 1                                                         | 1.2107135  |
| 217862_at    | 8554  | PIAS1    | protein inhibitor of activated STAT, 1                                                            | -1.0038208 |
| 201464_x_at  | 3725  | JUN      | jun oncogene                                                                                      | 1.3625202  |
| 208351_s_at  | 5594  | MAPK1    | mitogen-activated protein kinase 1                                                                | 1.3993459  |
| 205425_at    | 3092  | HIP1     | huntingtin interacting protein 1                                                                  | 1.3015054  |
| 232508_at    | 57178 | ZMIZ1    | zinc finger, MIZ-type containing 1                                                                | 1.7582873  |
| 208712_at    | 595   | CCND1    | cyclin D1                                                                                         | 1.6082519  |
| 222538_s_at  | 26060 | APPL1    | adaptor protein, phosphotyrosine interaction, PH domain and leucine zipper containing 1           | 1.48241    |
| 217373_x_at  | 4193  | MDM2     | Mdm2 p53 binding protein homolog (mouse)                                                          | 1.059963   |

|              |       |         |                                                                                                   |            |
|--------------|-------|---------|---------------------------------------------------------------------------------------------------|------------|
| 210671_x_at  | 5599  | MAPK8   | mitogen-activated protein kinase 8                                                                | 1.251937   |
| 201072_s_at  | 6599  | SMARCC1 | SWI/SNF related, matrix associated, actin dependent regulator of chromatin, subfamily c, member 1 | 1.5443164  |
| 214040_s_at  | 2934  | GSN     | gelsolin (amyloidosis, Finnish type)                                                              | 1.4653528  |
| 224848_at    | 1021  | CDK6    | cyclin-dependent kinase 6                                                                         | 1.2519114  |
| 211832_s_at  | 4193  | MDM2    | Mdm2 p53 binding protein homolog (mouse)                                                          | 1.1307522  |
| 1552812_a_at | 29843 | SENP1   | SUMO1/sentrin specific peptidase 1                                                                | 1.0909523  |
| 201073_s_at  | 6599  | SMARCC1 | SWI/SNF related, matrix associated, actin dependent regulator of chromatin, subfamily c, member 1 | 1.4465562  |
| 224851_at    | 1021  | CDK6    | cyclin-dependent kinase 6                                                                         | -1.1304286 |
| 226553_at    | 7113  | TMPRSS2 | transmembrane protease, serine 2                                                                  | 1.6381279  |
| 201466_s_at  | 3725  | JUN     | jun oncogene                                                                                      | 1.4405621  |
| 206038_s_at  | 7182  | NR2C2   | nuclear receptor subfamily 2, group C, member 2                                                   | 1.645849   |
| 205731_s_at  | 10499 | NCOA2   | nuclear receptor coactivator 2                                                                    | 1.366479   |
| 224847_at    | 1021  | CDK6    | cyclin-dependent kinase 6                                                                         | 1.2032081  |
| 201465_s_at  | 3725  | JUN     | jun oncogene                                                                                      | 1.8148279  |
| 202600_s_at  | 8204  | NRIP1   | nuclear receptor interacting protein 1                                                            | 2.2942686  |
| 208711_s_at  | 595   | CCND1   | cyclin D1                                                                                         | 2.1978722  |
