# Supplementary material
Source: PubMed Central journal article supplement (PMC5527892)
Supplement: MOL2-4-135-s009.pdf [file MOL2-4-135-s009.pdf]

**Supplemental Table 2: Genes involved in Androgen Mediated Signaling Pathway MDA-MB-231 cells**

| Probe Set ID | Entrez Gene           | Gene Symbol               | Gene Title                                                                          | Fold change<br>[TESTOBSA] vs [ctr] |
|--------------|-----------------------|---------------------------|-------------------------------------------------------------------------------------|------------------------------------|
| 224851_at    | 1021                  | CDK6                      | cyclin-dependent kinase 6                                                           | -2.606067                          |
| 216511_s_at  | 6934                  | TCF7L2                    | transcription factor 7-like 2 (T-cell specific, HMG-box)                            | -2.3479202                         |
| 206036_s_at  | 5966                  | REL                       | v-rel reticuloendotheliosis viral oncogene homolog (avian)                          | -1.5725265                         |
| 216035_x_at  | 6934                  | TCF7L2                    | transcription factor 7-like 2 (T-cell specific, HMG-box)                            | -1.8037434                         |
| 224847_at    | 1021                  | CDK6                      | cyclin-dependent kinase 6                                                           | -1.6773075                         |
| 201866_s_at  | 2908                  | NR3C1                     | nuclear receptor subfamily 3, group C, member 1 (glucocorticoid receptor)           | -1.9800817                         |
| 235287_at    | 1021                  | CDK6                      | cyclin-dependent kinase 6                                                           | -1.9162849                         |
| 216037_x_at  | 6934                  | TCF7L2                    | transcription factor 7-like 2 (T-cell specific, HMG-box)                            | -1.7651618                         |
| 211498_s_at  | 4824                  | NKX3-1                    | NK3 homeobox 1                                                                      | -1.3863761                         |
| 227958_s_at  | 2934                  | GSN                       | Gelsolin (amyloidosis, Finnish type)                                                | -1.4958534                         |
| 205731_s_at  | 10499                 | NCOA2                     | nuclear receptor coactivator 2                                                      | -1.5696424                         |
| 1558211_s_at | 6714                  | SRC                       | v-src sarcoma (Schmidt-Ruppin A-2) viral oncogene homolog (avian)                   | -1.4809521                         |
| 210477_x_at  | 5599                  | MAPK8                     | mitogen-activated protein kinase 8                                                  | -1.2581319                         |
| 218806_s_at  | 10451                 | VAV3                      | vav 3 guanine nucleotide exchange factor                                            | -1.280905                          |
| 203265_s_at  | 6416                  | MAP2K4                    | mitogen-activated protein kinase kinase 4                                           | -1.1640195                         |
| 243000_at    | 1021                  | CDK6                      | cyclin-dependent kinase 6                                                           | -1.1902932                         |
| 224848_at    | 1021                  | CDK6                      | cyclin-dependent kinase 6                                                           | -1.7519573                         |
| 244858_at    | 100129041 ///<br>7050 | LOC100129041<br>/// TGIF1 | hypothetical protein LOC100129041 /// TGFB-induced factor homeobox 1                | -1.3806729                         |
| 202631_s_at  | 10513                 | APPBP2                    | amyloid beta precursor protein (cytoplasmic tail) binding protein 2                 | -1.3686043                         |
| 214237_x_at  | 5074                  | PAWR                      | PRKC, apoptosis, WT1, regulator                                                     | -1.0807122                         |
| 201465_s_at  | 3725                  | JUN                       | jun oncogene                                                                        | -1.1793652                         |
| 208735_s_at  | 10106                 | CTDSP2                    | CTD (carboxy-terminal domain, RNA polymerase II, polypeptide A) small phosphatase 2 | -1.2285162                         |
| 216321_s_at  | 2908                  | NR3C1                     | nuclear receptor subfamily 3, group C, member 1 (glucocorticoid receptor)           | -1.7268162                         |
| 211671_s_at  | 2908                  | NR3C1                     | nuclear receptor subfamily 3, group C, member 1 (glucocorticoid receptor)           | -1.7539955                         |

|             |        |        |                                                                                         |            |
|-------------|--------|--------|-----------------------------------------------------------------------------------------|------------|
| 225565_at   | 1385   | CREB1  | cAMP responsive element binding protein 1                                               | -1.500526  |
| 218807_at   | 10451  | VAV3   | vav 3 guanine nucleotide exchange factor                                                | -1.5384709 |
| 237139_at   | 5152   | PDE9A  | phosphodiesterase 9A                                                                    | -1.3048058 |
| 203035_s_at | 10401  | PIAS3  | protein inhibitor of activated STAT, 3                                                  | -1.1768116 |
| 223380_s_at | 26524  | LATS2  | LATS, large tumor suppressor, homolog 2 (Drosophila)                                    | -1.5813468 |
| 206035_at   | 5966   | REL    | v-rel reticuloendotheliosis viral oncogene homolog (avian)                              | -1.5880998 |
| 209844_at   | 10481  | HOXB13 | homeobox B13                                                                            | -1.221937  |
| 212385_at   | 6925   | TCF4   | transcription factor 4                                                                  | -1.3983709 |
| 201865_x_at | 2908   | NR3C1  | nuclear receptor subfamily 3, group C, member 1 (glucocorticoid receptor)               | -1.7461474 |
| 233060_at   | 57178  | ZMIZ1  | zinc finger, MIZ-type containing 1                                                      | -1.8900065 |
| 222538_s_at | 26060  | APPL1  | adaptor protein, phosphotyrosine interaction, PH domain and leucine zipper containing 1 | -1.550613  |
| 235540_at   | 2796   | GNRH1  | gonadotropin-releasing hormone 1 (luteinizing-releasing hormone)                        | -1.1412084 |
| 205425_at   | 3092   | HIP1   | huntingtin interacting protein 1                                                        | -1.2061371 |
| 211391_s_at | 23598  | PATZ1  | POZ (BTB) and AT hook containing zinc finger 1                                          | -1.0445148 |
| 201209_at   | 3065   | HDAC1  | histone deacetylase 1                                                                   | -1.1378684 |
| 211110_s_at | 367    | AR     | androgen receptor                                                                       | -1.2624118 |
| 206546_at   | 10388  | SYCP2  | synaptonemal complex protein 2                                                          | -1.3492383 |
| 213301_x_at | 8805   | TRIM24 | tripartite motif-containing 24                                                          | -1.2873929 |
| 204313_s_at | 1385   | CREB1  | cAMP responsive element binding protein 1                                               | -1.2217959 |
| 204004_at   | 5074   | PAWR   | PRKC, apoptosis, WT1, regulator                                                         | -1.3064635 |
| 223379_s_at | 26524  | LATS2  | LATS, large tumor suppressor, homolog 2 (Drosophila)                                    | -1.2718618 |
| 203313_s_at | 7050   | TGIF1  | TGFB-induced factor homeobox 1                                                          | -1.2333944 |
| 243722_at   | 260434 | PYDC1  | PYD (pyrin domain) containing 1                                                         | -1.1543515 |
| 212762_s_at | 6934   | TCF7L2 | transcription factor 7-like 2 (T-cell specific, HMG-box)                                | -1.6441821 |
| 203445_s_at | 10106  | CTDSP2 | CTD (carboxy-terminal domain, RNA polymerase II, polypeptide A) small phosphatase 2     | -1.3883401 |
| 227013_at   | 26524  | LATS2  | LATS, large tumor suppressor, homolog 2 (Drosophila)                                    | -1.4335368 |
| 217844_at   | 58190  | CTDSP1 | CTD (carboxy-terminal domain, RNA polymerase II, polypeptide A) small phosphatase 1     | -1.2175213 |
| 209192_x_at | 10524  | KAT5   | K(lysine) acetyltransferase 5                                                           | -1.1257727 |
| 217862_at   | 8554   | PIAS1  | protein inhibitor of activated STAT, 1                                                  | -1.5892031 |
| 221906_at   | 114112 | TXNRD3 | thioredoxin reductase 3                                                                 | 1.0454956  |

|             |       |         |                                                                     |            |
|-------------|-------|---------|---------------------------------------------------------------------|------------|
| 212689_s_at | 55818 | KDM3A   | lysine (K)-specific demethylase 3A                                  | -1.1119878 |
| 209710_at   | 2624  | GATA2   | GATA binding protein 2                                              | -1.4291306 |
| 214846_s_at | 57538 | ALPK3   | alpha-kinase 3                                                      | -1.2157865 |
| 225452_at   | 5469  | MED1    | mediator complex subunit 1                                          | -1.2945608 |
| 201339_s_at | 6342  | SCP2    | sterol carrier protein 2                                            | -1.0511692 |
| 211156_at   | 1029  | CDKN2A  | cyclin-dependent kinase inhibitor 2A (melanoma, p16, inhibits CDK4) | 1.2647917  |
| 207221_at   | 9002  | F2RL3   | coagulation factor II (thrombin) receptor-like 3                    | -1.2056078 |
| 200696_s_at | 2934  | GSN     | gelsolin (amyloidosis, Finnish type)                                | -1.0297537 |
| 207907_at   | 8740  | TNFSF14 | tumor necrosis factor (ligand) superfamily, member 14               | -1.3475211 |
| 204391_x_at | 8805  | TRIM24  | tripartite motif-containing 24                                      | -1.2503793 |
| 210358_x_at | 2624  | GATA2   | GATA binding protein 2                                              | -1.1262178 |
| 214513_s_at | 1385  | CREB1   | cAMP responsive element binding protein 1                           | 1.1165727  |
| 214258_x_at | 10524 | KAT5    | K(lysine) acetyltransferase 5                                       | 1.0520728  |
| 224621_at   | 5594  | MAPK1   | mitogen-activated protein kinase 1                                  | -1.1938274 |
| 212749_s_at | 25898 | RCHY1   | ring finger and CHY zinc finger domain containing 1                 | 1.0267256  |
| 209984_at   | 23081 | KDM4C   | lysine (K)-specific demethylase 4C                                  | -1.0756949 |
| 212382_at   | 6925  | TCF4    | transcription factor 4                                              | -1.1617875 |
| 213535_s_at | 7329  | UBE2I   | ubiquitin-conjugating enzyme E2I (UBC9 homolog, yeast)              | 1.0707802  |
| 209107_x_at | 8648  | NCOA1   | nuclear receptor coactivator 1                                      | -1.0908791 |
| 1570433_at  | 7113  | TMPRSS2 | transmembrane protease, serine 2                                    | -1.1169846 |
| 203845_at   | 8850  | KAT2B   | K(lysine) acetyltransferase 2B                                      | -1.1965507 |
| 217863_at   | 8554  | PIAS1   | protein inhibitor of activated STAT, 1                              | -1.345469  |
| 203266_s_at | 6416  | MAP2K4  | mitogen-activated protein kinase kinase 4                           | -1.0082512 |
| 208979_at   | 23054 | NCOA6   | nuclear receptor coactivator 6                                      | -1.0309749 |
| 202629_at   | 10513 | APPBP2  | amyloid beta precursor protein (cytoplasmic tail) binding protein 2 | -1.1558597 |
| 212271_at   | 5594  | MAPK1   | mitogen-activated protein kinase 1                                  | -1.0250411 |
| 205698_s_at | 5608  | MAP2K6  | mitogen-activated protein kinase kinase 6                           | -1.1364442 |
| 220192_x_at | 25803 | SPDEF   | SAM pointed domain containing ets transcription factor              | 1.0408067  |
| 215564_at   | 374   | AREG    | Amphiregulin                                                        | -1.1347686 |
| 207143_at   | 1021  | CDK6    | cyclin-dependent kinase 6                                           | -1.2221688 |
| 226553_at   | 7113  | TMPRSS2 | transmembrane protease, serine 2                                    | -1.0408583 |
| 204312_x_at | 1385  | CREB1   | cAMP responsive element binding protein 1                           | 1.0300914  |
| 204791_at   | 7181  | NR2C1   | nuclear receptor subfamily 2, group C, member 1                     | -1.1661259 |

|             |               |                    |                                                                                                   |            |
|-------------|---------------|--------------------|---------------------------------------------------------------------------------------------------|------------|
| 204005_s_at | 5074          | PAWR               | PRKC, apoptosis, WT1, regulator                                                                   | -1.2197253 |
| 229515_at   | 5074          | PAWR               | PRKC, apoptosis, WT1, regulator                                                                   | -1.1635779 |
| 211968_s_at | 3320          | HSP90AA1           | heat shock protein 90kDa alpha (cytosolic), class A member 1                                      | -1.1813633 |
| 201072_s_at | 6599          | SMARCC1            | SWI/SNF related, matrix associated, actin dependent regulator of chromatin, subfamily c, member 1 | -1.2056425 |
| 225160_x_at | 4193          | MDM2               | Mdm2 p53 binding protein homolog (mouse)                                                          | 1.0337832  |
| 207808_s_at | 5627          | PROS1              | protein S (alpha)                                                                                 | -1.0282769 |
| 209106_at   | 8648          | NCOA1              | nuclear receptor coactivator 1                                                                    | -1.0692192 |
| 210249_s_at | 8648          | NCOA1              | nuclear receptor coactivator 1                                                                    | 1.0529021  |
| 206645_s_at | 190           | NR0B1              | nuclear receptor subfamily 0, group B, member 1                                                   | -1.1517144 |
| 231388_at   | 24149         | ZNF318             | Zinc finger protein 318                                                                           | -1.2860706 |
| 202401_s_at | 6722          | SRF                | serum response factor (c-fos serum response element-binding transcription factor)                 | 1.1679218  |
| 217937_s_at | 51564         | HDAC7              | histone deacetylase 7                                                                             | -1.0332581 |
| 209706_at   | 4824          | NKX3-1             | NK3 homeobox 1                                                                                    | -1.0339701 |
| 214040_s_at | 2934          | GSN                | gelsolin (amyloidosis, Finnish type)                                                              | 1.1453373  |
| 209115_at   | 9039          | UBA3               | ubiquitin-like modifier activating enzyme 3                                                       | -1.1002015 |
| 226695_at   | 5396          | PRRX1              | paired related homeobox 1                                                                         | -1.0519977 |
| 232508_at   | 57178         | ZMIZ1              | zinc finger, MIZ-type containing 1                                                                | -1.0333862 |
| 1555897_at  | 23028         | KDM1               | lysine (K)-specific demethylase 1                                                                 | -1.1523529 |
| 212761_at   | 6934          | TCF7L2             | transcription factor 7-like 2 (T-cell specific, HMG-box)                                          | -1.3800912 |
| 207163_s_at | 207           | AKT1               | v-akt murine thymoma viral oncogene homolog 1                                                     | 1.1331486  |
| 212759_s_at | 6934          | TCF7L2             | transcription factor 7-like 2 (T-cell specific, HMG-box)                                          | -1.4230609 |
| 1566901_at  | 7050          | TGIF1              | TGFB-induced factor homeobox 1                                                                    | -1.7821063 |
| 213441_x_at | 25803         | SPDEF              | SAM pointed domain containing ets transcription factor                                            | -1.06023   |
| 225477_s_at | 7182          | NR2C2              | nuclear receptor subfamily 2, group C, member 2                                                   | -1.281619  |
| 236094_at   | 6934          | TCF7L2             | Transcription factor 7-like 2 (T-cell specific, HMG-box)                                          | -1.2281054 |
| 212881_at   | 51588         | PIAS4              | protein inhibitor of activated STAT, 4                                                            | 1.1139964  |
| 206689_x_at | 10524         | KAT5               | K(lysine) acetyltransferase 5                                                                     | 1.1074083  |
| 204531_s_at | 672           | BRCA1              | breast cancer 1, early onset                                                                      | -1.0870832 |
| 225456_at   | 5469          | MED1               | mediator complex subunit 1                                                                        | 1.0374271  |
| 201522_x_at | 6638 /// 8926 | SNRPN ///<br>SNURF | small nuclear ribonucleoprotein polypeptide N /// SNRPN upstream reading frame                    | 1.2700211  |
| 209105_at   | 8648          | NCOA1              | nuclear receptor coactivator 1                                                                    | -1.0239995 |

|              |       |         |                                                                                                   |            |
|--------------|-------|---------|---------------------------------------------------------------------------------------------------|------------|
| 205372_at    | 5324  | PLAG1   | pleiomorphic adenoma gene 1                                                                       | 1.0135192  |
| 1568874_at   | 23054 | NCOA6   | nuclear receptor coactivator 6                                                                    | -1.0791153 |
| 201694_s_at  | 1958  | EGR1    | early growth response 1                                                                           | 1.198674   |
| 1556493_a_at | 23081 | KDM4C   | lysine (K)-specific demethylase 4C                                                                | -1.0462105 |
| 205699_at    | 5608  | MAP2K6  | mitogen-activated protein kinase kinase 6                                                         | -1.0320146 |
| 201074_at    | 6599  | SMARCC1 | SWI/SNF related, matrix associated, actin dependent regulator of chromatin, subfamily c, member 1 | -1.0031635 |
| 212348_s_at  | 23028 | KDM1    | lysine (K)-specific demethylase 1                                                                 | 1.0477061  |
| 212743_at    | 25898 | RCHY1   | ring finger and CHY zinc finger domain containing 1                                               | -1.019483  |
| 211832_s_at  | 4193  | MDM2    | Mdm2 p53 binding protein homolog (mouse)                                                          | 1.0266564  |
| 201654_s_at  | 3339  | HSPG2   | heparan sulfate proteoglycan 2                                                                    | 1.0612376  |
| 201693_s_at  | 1958  | EGR1    | early growth response 1                                                                           | 1.0173557  |
| 215402_at    | 10513 | APPBP2  | amyloid beta precursor protein (cytoplasmic tail) binding protein 2                               | -1.1234729 |
| 221281_at    | 6714  | SRC     | v-src sarcoma (Schmidt-Ruppin A-2) viral oncogene homolog (avian)                                 | -1.1459785 |
| 233360_at    | 7329  | UBE2I   | ubiquitin-conjugating enzyme E2I (UBC9 homolog, yeast)                                            | 1.131255   |
| 202400_s_at  | 6722  | SRF     | serum response factor (c-fos serum response element-binding transcription factor)                 | 1.017733   |
| 54970_at     | 83637 | ZMIZ2   | zinc finger, MIZ-type containing 2                                                                | -1.1990116 |
| 213891_s_at  | 6925  | TCF4    | transcription factor 4                                                                            | -1.2137672 |
| 239585_at    | 8850  | KAT2B   | K(lysine) acetyltransferase 2B                                                                    | -1.0791274 |
| 208676_s_at  | 5036  | PA2G4   | proliferation-associated 2G4, 38kDa                                                               | -1.0002486 |
| 204583_x_at  | 354   | KLK3    | kallikrein-related peptidase 3                                                                    | 1.101463   |
| 204039_at    | 1050  | CEBPA   | CCAAT/enhancer binding protein (C/EBP), alpha                                                     | 1.0752844  |
| 231198_at    | 1021  | CDK6    | cyclin-dependent kinase 6                                                                         | 1.4460877  |
| 214403_x_at  | 25803 | SPDEF   | SAM pointed domain containing ets transcription factor                                            | -1.0645634 |
| 203520_s_at  | 24149 | ZNF318  | zinc finger protein 318                                                                           | 1.1270497  |
| 1559529_at   | 5747  | PTK2    | PTK2 protein tyrosine kinase 2                                                                    | -1.1546309 |
| 200881_s_at  | 3301  | DNAJA1  | DnaJ (Hsp40) homolog, subfamily A, member 1                                                       | 1.2468235  |
| 216917_s_at  | 6847  | SYCP1   | synaptonemal complex protein 1                                                                    | -1.0983037 |
| 220302_at    | 4117  | MAK     | male germ cell-associated kinase                                                                  | -1.0179776 |
| 208820_at    | 5747  | PTK2    | PTK2 protein tyrosine kinase 2                                                                    | 1.0514568  |
| 1553529_at   | 80834 | TAS1R2  | taste receptor, type 1, member 2                                                                  | 1.0405091  |
| 214404_x_at  | 25803 | SPDEF   | SAM pointed domain containing ets transcription factor                                            | 1.0792537  |

|             |                    |                      |                                                                                      |            |
|-------------|--------------------|----------------------|--------------------------------------------------------------------------------------|------------|
| 216422_at   | 5036 ///<br>647033 | PA2G4 ///<br>PA2G4P4 | proliferation-associated 2G4, 38kDa /// proliferation-associated 2G4<br>pseudogene 4 | 1.0627487  |
| 211497_x_at | 4824               | NKX3-1               | NK3 homeobox 1                                                                       | -1.4199755 |
| 201244_s_at | 5894               | RAF1                 | v-raf-1 murine leukemia viral oncogene homolog 1                                     | 1.1514815  |
| 226048_at   | 5599               | MAPK8                | mitogen-activated protein kinase 8                                                   | 1.0157242  |
| 205426_s_at | 3092               | HIP1                 | huntingtin interacting protein 1                                                     | 1.1468962  |
| 201454_s_at | 9520               | NPEPPS               | aminopeptidase puromycin sensitive                                                   | -1.0630779 |
| 1552758_at  | 9734               | HDAC9                | histone deacetylase 9                                                                | 1.3079678  |
| 237891_at   | 4193               | MDM2                 | Mdm2 p53 binding protein homolog (mouse)                                             | -1.2235838 |
| 208680_at   | 5052               | PRDX1                | peroxiredoxin 1                                                                      | 1.1768427  |
| 207821_s_at | 5747               | PTK2                 | PTK2 protein tyrosine kinase 2                                                       | 1.1606511  |
| 231289_at   | 8648               | NCOA1                | Nuclear receptor coactivator 1                                                       | 1.0924103  |
| 229664_at   | 5599               | MAPK8                | mitogen-activated protein kinase 8                                                   | 1.1546286  |
| 207484_s_at | 10919              | EHMT2                | euchromatic histone-lysine N-methyltransferase 2                                     | -1.0197654 |
| 217864_s_at | 8554               | PIAS1                | protein inhibitor of activated STAT, 1                                               | -1.1714817 |
| 201466_s_at | 3725               | JUN                  | jun oncogene                                                                         | 1.0712786  |
| 202723_s_at | 2308               | FOXO1                | forkhead box O1                                                                      | -1.0757912 |
| 244385_at   | 23081              | KDM4C                | Lysine (K)-specific demethylase 4C                                                   | 1.1883293  |
| 210774_s_at | 8031               | NCOA4                | nuclear receptor coactivator 4                                                       | 1.0072992  |
| 205593_s_at | 5152               | PDE9A                | phosphodiesterase 9A                                                                 | 1.3013119  |
| 209580_s_at | 8930               | MBD4                 | methyl-CpG binding domain protein 4                                                  | 1.2114199  |
| 217634_at   | 6840               | SVIL                 | supervillin                                                                          | -1.0181133 |
| 200651_at   | 10399              | GNB2L1               | guanine nucleotide binding protein (G protein), beta polypeptide 2-like 1            | 1.1317748  |
| 209431_s_at | 23598              | PATZ1                | POZ (BTB) and AT hook containing zinc finger 1                                       | 1.0950521  |
| 209354_at   | 8764               | TNFRSF14             | tumor necrosis factor receptor superfamily, member 14 (herpesvirus entry mediator)   | -1.0078294 |
| 206038_s_at | 7182               | NR2C2                | nuclear receptor subfamily 2, group C, member 2                                      | 1.0216597  |
| 1557675_at  | 5894               | RAF1                 | V-raf-1 murine leukemia viral oncogene homolog 1                                     | -1.1522486 |
| 211689_s_at | 7113               | TMPRSS2              | transmembrane protease, serine 2                                                     | 1.3330263  |
| 211008_s_at | 7329               | UBE2I                | ubiquitin-conjugating enzyme E2I (UBC9 homolog, yeast)                               | 1.0642585  |
| 205102_at   | 7113               | TMPRSS2              | transmembrane protease, serine 2                                                     | 1.0128742  |
| 214281_s_at | 25898              | RCHY1                | ring finger and CHY zinc finger domain containing 1                                  | 1.1305635  |
| 212696_s_at | 6047               | RNF4                 | ring finger protein 4                                                                | 1.0585626  |
| 214280_x_at | 3178               | HNRNPA1              | heterogeneous nuclear ribonucleoprotein A1                                           | 1.0466511  |

|              |                    |                          |                                                                                                   |            |
|--------------|--------------------|--------------------------|---------------------------------------------------------------------------------------------------|------------|
| 207954_at    | 2624               | GATA2                    | GATA binding protein 2                                                                            | -1.2858471 |
| 213119_at    | 206358             | SLC36A1                  | solute carrier family 36 (proton/amino acid symporter), member 1                                  | 1.1288668  |
| 203110_at    | 2185               | PTK2B                    | PTK2B protein tyrosine kinase 2 beta                                                              | 1.0058646  |
| 212386_at    | 6925               | TCF4                     | transcription factor 4                                                                            | 1.017025   |
| 220892_s_at  | 29968              | PSAT1                    | phosphoserine aminotransferase 1                                                                  | 1.1531177  |
| 210211_s_at  | 3320               | HSP90AA1                 | heat shock protein 90kDa alpha (cytosolic), class A member 1                                      | -1.0354903 |
| 203753_at    | 6925               | TCF4                     | transcription factor 4                                                                            | -1.0772811 |
| 215689_s_at  | 6462               | SHBG                     | sex hormone-binding globulin                                                                      | -1.2563927 |
| 200880_at    | 3301               | DNAJA1                   | DnaJ (Hsp40) homolog, subfamily A, member 1                                                       | 1.1885941  |
| 201073_s_at  | 6599               | SMARCC1                  | SWI/SNF related, matrix associated, actin dependent regulator of chromatin, subfamily c, member 1 | -1.1772585 |
| 200016_x_at  | 3178               | HNRNPA1                  | heterogeneous nuclear ribonucleoprotein A1                                                        | -1.0761675 |
| 1552760_at   | 9734               | HDAC9                    | histone deacetylase 9                                                                             | 1.1146184  |
| 222040_at    | 3178 ///<br>728844 | HNRNPA1 ///<br>LOC728844 | heterogeneous nuclear ribonucleoprotein A1 /// hypothetical LOC728844                             | -1.0579149 |
| 237920_at    | 10388              | SYCP2                    | Synaptonemal complex protein 2                                                                    | 1.0023347  |
| 1565082_x_at | 6714               | SRC                      | v-src sarcoma (Schmidt-Ruppin A-2) viral oncogene homolog (avian)                                 | -1.0444294 |
| 218158_s_at  | 26060              | APPL1                    | adaptor protein, phosphotyrosine interaction, PH domain and leucine zipper containing 1           | -1.0006374 |
| 230348_at    | 26524              | LATS2                    | LATS, large tumor suppressor, homolog 2 (Drosophila)                                              | 1.0948694  |
| 205732_s_at  | 10499              | NCOA2                    | nuclear receptor coactivator 2                                                                    | -1.0070568 |
| 227957_at    | 2934               | GSN                      | Gelsolin (amyloidosis, Finnish type)                                                              | -1.0695688 |
| 209494_s_at  | 23598              | PATZ1                    | POZ (BTB) and AT hook containing zinc finger 1                                                    | 1.0199529  |
| 211969_at    | 3320               | HSP90AA1                 | heat shock protein 90kDa alpha (cytosolic), class A member 1                                      | -1.0760373 |
| 221924_at    | 83637              | ZMIZ2                    | zinc finger, MIZ-type containing 2                                                                | 1.0760188  |
| 230105_at    | 10481              | HOXB13                   | homeobox B13                                                                                      | 1.010434   |
| 1560305_x_at | 2288               | FKBP4                    | FK506 binding protein 4, 59kDa                                                                    | 1.1670166  |
| 211393_at    | 23598              | PATZ1                    | POZ (BTB) and AT hook containing zinc finger 1                                                    | 1.0745513  |
| 204314_s_at  | 1385               | CREB1                    | cAMP responsive element binding protein 1                                                         | -1.1022208 |
| 203521_s_at  | 24149              | ZNF318                   | zinc finger protein 318                                                                           | 1.1218088  |
| 211733_x_at  | 6342               | SCP2                     | sterol carrier protein 2                                                                          | -1.0306404 |

|              |                    |                          |                                                                       |            |
|--------------|--------------------|--------------------------|-----------------------------------------------------------------------|------------|
| 201655_s_at  | 3339               | HSPG2                    | heparan sulfate proteoglycan 2                                        | 1.027791   |
| 213536_s_at  | 7329               | UBE2I                    | Ubiquitin-conjugating enzyme E2I (UBC9 homolog, yeast)                | -1.0263978 |
| 221525_at    | 83637              | ZMIZ2                    | zinc finger, MIZ-type containing 2                                    | 1.3481345  |
| 206644_at    | 190                | NROB1                    | nuclear receptor subfamily 0, group B, member 1                       | 1.0844952  |
| 202949_s_at  | 2274               | FHL2                     | four and a half LIM domains 2                                         | 1.3122817  |
| 202161_at    | 5585               | PKN1                     | protein kinase N1                                                     | 1.1482354  |
| 208760_at    | 7329               | UBE2I                    | Ubiquitin-conjugating enzyme E2I (UBC9 homolog, yeast)                | 1.078395   |
| 205991_s_at  | 5396               | PRRX1                    | paired related homeobox 1                                             | -1.0389994 |
| 211851_x_at  | 672                | BRCA1                    | breast cancer 1, early onset                                          | -1.0831249 |
| 202326_at    | 10919              | EHMT2                    | euchromatic histone-lysine N-methyltransferase 2                      | 1.0755421  |
| 215605_at    | 10499              | NCOA2                    | Nuclear receptor coactivator 2                                        | -1.0776988 |
| 226046_at    | 5599               | MAPK8                    | mitogen-activated protein kinase 8                                    | -1.025164  |
| 221284_s_at  | 6714               | SRC                      | v-src sarcoma (Schmidt-Ruppin A-2) viral oncogene homolog (avian)     | -1.024852  |
| 1552812_a_at | 29843              | SEN1                     | SUMO1/sentrin specific peptidase 1                                    | 1.1673657  |
| 1558088_a_at | 7329               | UBE2I                    | ubiquitin-conjugating enzyme E2I (UBC9 homolog, yeast)                | -1.2147754 |
| 237289_at    | 1385               | CREB1                    | cAMP responsive element binding protein 1                             | 1.0105646  |
| 206740_x_at  | 6847               | SYCP1                    | synaptonemal complex protein 1                                        | 1.0250988  |
| 209651_at    | 7041               | TGFB11                   | transforming growth factor beta 1 induced transcript 1                | 1.1157349  |
| 226364_at    | 3092               | HIP1                     | Huntingtin interacting protein 1                                      | 1.0901942  |
| 202630_at    | 10513              | APPBP2                   | amyloid beta precursor protein (cytoplasmic tail) binding protein 2   | -1.1040373 |
| 234393_at    | 9734               | HDAC9                    | histone deacetylase 9                                                 | -1.407431  |
| 228837_at    | 6925               | TCF4                     | transcription factor 4                                                | -1.4651128 |
| 221919_at    | 3178 ///<br>728844 | HNRNPA1 ///<br>LOC728844 | heterogeneous nuclear ribonucleoprotein A1 /// hypothetical LOC728844 | 1.2125872  |
| 202724_s_at  | 2308               | FOXO1                    | forkhead box O1                                                       | -1.005307  |
| 223062_s_at  | 29968              | PSAT1                    | phosphoserine aminotransferase 1                                      | 1.7485257  |
| 225572_at    | 1385               | CREB1                    | cAMP responsive element binding protein 1                             | -1.1089071 |
| 213442_x_at  | 25803              | SPDEF                    | SAM pointed domain containing ets transcription factor                | 1.0103     |
| 244616_x_at  | 4193               | MDM2                     | Mdm2 p53 binding protein homolog (mouse)                              | 1.3006501  |
| 203843_at    | 6197               | RPS6KA3                  | ribosomal protein S6 kinase, 90kDa, polypeptide 3                     | 1.0299817  |
| 1565080_at   | 6714               | SRC                      | v-src sarcoma (Schmidt-Ruppin A-2) viral oncogene homolog (avian)     | 1.1388252  |



|              |       |          |                                                                                                   |            |
|--------------|-------|----------|---------------------------------------------------------------------------------------------------|------------|
| 218878_s_at  | 23411 | SIRT1    | sirtuin (silent mating type information regulation 2 homolog) 1 (S. cerevisiae)                   | -1.0176665 |
| 200049_at    | 11143 | MYST2    | MYST histone acetyltransferase 2                                                                  | 1.120797   |
| 215354_s_at  | 27043 | PELP1    | proline, glutamate and leucine rich protein 1                                                     | 1.1331141  |
| 208351_s_at  | 5594  | MAPK1    | mitogen-activated protein kinase 1                                                                | 1.0621563  |
| 201075_s_at  | 6599  | SMARCC1  | SWI/SNF related, matrix associated, actin dependent regulator of chromatin, subfamily c, member 1 | 1.1173092  |
| 222146_s_at  | 6925  | TCF4     | transcription factor 4                                                                            | 1.11739    |
| 213324_at    | 6714  | SRC      | v-src sarcoma (Schmidt-Ruppin A-2) viral oncogene homolog (avian)                                 | 1.060693   |
| 207987_s_at  | 2796  | GNRH1    | gonadotropin-releasing hormone 1 (luteinizing-releasing hormone)                                  | 1.0227132  |
| 1560317_s_at | 3092  | HIP1     | huntingtin interacting protein 1                                                                  | 1.0361955  |
| 209579_s_at  | 8930  | MBD4     | methyl-CpG binding domain protein 4                                                               | 1.062898   |
| 224620_at    | 5594  | MAPK1    | Mitogen-activated protein kinase 1                                                                | -1.121937  |
| 212512_s_at  | 10498 | CARM1    | coactivator-associated arginine methyltransferase 1                                               | 1.018445   |
| 207039_at    | 1029  | CDKN2A   | cyclin-dependent kinase inhibitor 2A (melanoma, p16, inhibits CDK4)                               | -1.0863651 |
| 228342_s_at  | 57538 | ALPK3    | alpha-kinase 3                                                                                    | 1.0363253  |
| 209855_s_at  | 3817  | KLK2     | kallikrein-related peptidase 2                                                                    | -1.0274837 |
| 211621_at    | 367   | AR       | androgen receptor                                                                                 | 1.0647947  |
| 214328_s_at  | 3320  | HSP90AA1 | heat shock protein 90kDa alpha (cytosolic), class A member 1                                      | 1.021602   |
| 214048_at    | 8930  | MBD4     | methyl-CpG binding domain protein 4                                                               | 1.0450344  |
| 217373_x_at  | 4193  | MDM2     | Mdm2 p53 binding protein homolog (mouse)                                                          | 1.4668089  |
| 211392_s_at  | 23598 | PATZ1    | POZ (BTB) and AT hook containing zinc finger 1                                                    | 1.206194   |
| 210530_s_at  | 7181  | NR2C1    | nuclear receptor subfamily 2, group C, member 1                                                   | 1.2707424  |
| 212124_at    | 57178 | ZMIZ1    | zinc finger, MIZ-type containing 1                                                                | 1.1541502  |
| 222034_at    | 10399 | GNB2L1   | Guanine nucleotide binding protein (G protein), beta polypeptide 2-like 1                         | 1.2393336  |
| 201455_s_at  | 9520  | NPEPPS   | aminopeptidase puromycin sensitive                                                                | 1.1804774  |
| 203111_s_at  | 2185  | PTK2B    | PTK2B protein tyrosine kinase 2 beta                                                              | -1.0549779 |
| 228484_s_at  | 2308  | FOXO1    | Forkhead box O1                                                                                   | 1.0875925  |
| 210581_x_at  | 23598 | PATZ1    | POZ (BTB) and AT hook containing zinc finger 1                                                    | 1.2064524  |
| 226619_at    | 29843 | SENP1    | SUMO1/sentrin specific peptidase 1                                                                | 1.1064329  |

|              |                        |                           |                                                                     |            |
|--------------|------------------------|---------------------------|---------------------------------------------------------------------|------------|
| 1555545_at   | 3817                   | KLK2                      | kallikrein-related peptidase 2                                      | -1.1527464 |
| 201464_x_at  | 3725                   | JUN                       | jun oncogene                                                        | 1.2184689  |
| 203497_at    | 5469                   | MED1                      | mediator complex subunit 1                                          | 1.1613387  |
| 205659_at    | 9734                   | HDAC9                     | histone deacetylase 9                                               | 1.0131183  |
| 59631_at     | 114112                 | TXNRD3                    | thioredoxin reductase 3                                             | 1.3260971  |
| 229079_at    | 10919                  | EHMT2                     | Euchromatic histone-lysine N-methyltransferase 2                    | -1.1925232 |
| 1555315_a_at | 4117                   | MAK                       | male germ cell-associated kinase                                    | 1.0589166  |
| 236309_x_at  | 83637                  | ZMIZ2                     | zinc finger, MIZ-type containing 2                                  | 1.0108923  |
| 210671_x_at  | 5599                   | MAPK8                     | mitogen-activated protein kinase 8                                  | -1.1039445 |
| 203496_s_at  | 5469                   | MED1                      | mediator complex subunit 1                                          | 1.2074134  |
| 1552264_a_at | 5594                   | MAPK1                     | mitogen-activated protein kinase 1                                  | 1.1056484  |
| 229847_at    | 5594                   | MAPK1                     | Mitogen-activated protein kinase 1                                  | -1.1086978 |
| 205386_s_at  | 4193                   | MDM2                      | Mdm2 p53 binding protein homolog (mouse)                            | 1.2157186  |
| 201272_at    | 231                    | AKR1B1                    | aldo-keto reductase family 1, member B1 (aldose reductase)          | -1.0486654 |
| 209644_x_at  | 1029                   | CDKN2A                    | cyclin-dependent kinase inhibitor 2A (melanoma, p16, inhibits CDK4) | -1.026879  |
| 242758_x_at  | 55818                  | KDM3A                     | lysine (K)-specific demethylase 3A                                  | -1.0094942 |
| 210531_at    | 7181                   | NR2C1                     | nuclear receptor subfamily 2, group C, member 1                     | -1.0264616 |
| 224221_s_at  | 10451                  | VAV3                      | vav 3 guanine nucleotide exchange factor                            | 1.2954943  |
| 205385_at    | 4193                   | MDM2                      | Mdm2 p53 binding protein homolog (mouse)                            | 1.027556   |
| 229711_s_at  | 4193                   | MDM2                      | Mdm2 p53 binding protein homolog (mouse)                            | 1.2560265  |
| 214047_s_at  | 8930                   | MBD4                      | methyl-CpG binding domain protein 4                                 | 1.2901795  |
| 200895_s_at  | 2288                   | FKBP4                     | FK506 binding protein 4, 59kDa                                      | 1.4443748  |
| 204582_s_at  | 354                    | KLK3                      | kallikrein-related peptidase 3                                      | 1.108837   |
| 212879_x_at  | 100134427 ///<br>51588 | LOC100134427<br>/// PIAS4 | similar to PIAS4 protein /// protein inhibitor of activated STAT, 4 | 1.1764274  |
| 210339_s_at  | 3817                   | KLK2                      | kallikrein-related peptidase 2                                      | 1.0163186  |
| 1558210_at   | 6714                   | SRC                       | v-src sarcoma (Schmidt-Ruppin A-2) viral oncogene homolog (avian)   | 1.1834706  |
| 202566_s_at  | 6840                   | SVIL                      | supervillin                                                         | 1.6080478  |
| 214861_at    | 23081                  | KDM4C                     | lysine (K)-specific demethylase 4C                                  | 1.2516205  |
| 229956_at    | 7181                   | NR2C1                     | nuclear receptor subfamily 2, group C, member 1                     | 1.048121   |
| 207893_at    | 6736                   | SRY                       | sex determining region Y                                            | 1.0507412  |
| 200894_s_at  | 2288                   | FKBP4                     | FK506 binding protein 4, 59kDa                                      | 1.6741991  |

|             |               |                    |                                                                                   |            |
|-------------|---------------|--------------------|-----------------------------------------------------------------------------------|------------|
| 205239_at   | 374           | AREG               | amphiregulin                                                                      | 1.6838887  |
| 212387_at   | 6925          | TCF4               | transcription factor 4                                                            | 1.1998671  |
| 226335_at   | 6197          | RPS6KA3            | ribosomal protein S6 kinase, 90kDa, polypeptide 3                                 | 1.1851671  |
| 209854_s_at | 3817          | KLK2               | kallikrein-related peptidase 2                                                    | 1.2272387  |
| 206042_x_at | 6638 /// 8926 | SNRPN ///<br>SNURF | small nuclear ribonucleoprotein polypeptide N /// SNRPN upstream<br>reading frame | 1.0314654  |
| 231629_x_at | 354           | KLK3               | Kallikrein-related peptidase 3                                                    | 1.253187   |
| 214794_at   | 5036          | PA2G4              | proliferation-associated 2G4, 38kDa                                               | 1.5175587  |
| 217542_at   | 4193          | MDM2               | Mdm2 p53 binding protein homolog (mouse)                                          | 1.4527739  |
| 236326_at   | 51564         | HDAC7              | histone deacetylase 7                                                             | -1.0104475 |
| 208711_s_at | 595           | CCND1              | cyclin D1                                                                         | 1.2710332  |
| 235300_x_at | 25898         | RCHY1              | ring finger and CHY zinc finger domain containing 1                               | 1.1928315  |
| 1552263_at  | 5594          | MAPK1              | mitogen-activated protein kinase 1                                                | 1.2406754  |
| 202565_s_at | 6840          | SVIL               | supervillin                                                                       | 1.5341     |
| 1560303_at  | 2288          | FKBP4              | FK506 binding protein 4, 59kDa                                                    | 1.5557132  |
| 207433_at   | 3586          | IL10               | interleukin 10                                                                    | 1.2329057  |
| 1553272_at  | 206358        | SLC36A1            | solute carrier family 36 (proton/amino acid symporter), member 1                  | 1.0277051  |
| 241453_at   | 5747          | PTK2               | PTK2 protein tyrosine kinase 2                                                    | 1.4517127  |
| 202599_s_at | 8204          | NRIP1              | nuclear receptor interacting protein 1                                            | 1.5171183  |
| 227404_s_at | 1958          | EGR1               | Early growth response 1                                                           | 1.4872253  |
| 202600_s_at | 8204          | NRIP1              | nuclear receptor interacting protein 1                                            | 1.4953661  |
| 208712_at   | 595           | CCND1              | cyclin D1                                                                         | 2.0786047  |
| 209189_at   | 2353          | FOS                | v-fos FBJ murine osteosarcoma viral oncogene homolog                              | 2.9446747  |
| 213281_at   | 3725          | JUN                | Jun oncogene                                                                      | 1.7687879  |
