# Supplementary material
Source: PubMed Central journal article supplement (PMC5527892)
Supplement: MOL2-4-135-s010.pdf [file MOL2-4-135-s010.pdf]

**Supplemental Table 3: HIF1 $\alpha$  Transcription Network T47D cells**

| Probe Set ID | Entrez Gene       | Gene Symbol  | Gene Title                                                                                                                                                            | Fold change [TESTOBSA] vs [ctr] |
|--------------|-------------------|--------------|-----------------------------------------------------------------------------------------------------------------------------------------------------------------------|---------------------------------|
| 201565_s_at  | 3398              | ID2          | inhibitor of DNA binding 2, dominant negative helix-loop-helix protein                                                                                                | -3.494648                       |
| 201566_x_at  | 3398              | ID2          | inhibitor of DNA binding 2, dominant negative helix-loop-helix protein                                                                                                | -3.1406143                      |
| 213931_at    | 3398 ///<br>84099 | ID2 /// ID2B | inhibitor of DNA binding 2, dominant negative helix-loop-helix protein ///<br>inhibitor of DNA binding 2B, dominant negative helix-loop-helix protein<br>(pseudogene) | -2.108427                       |
| 205659_at    | 9734              | HDAC9        | histone deacetylase 9                                                                                                                                                 | -1.7622132                      |
| 209357_at    | 10370             | CITED2       | Cbp/p300-interacting transactivator, with Glu/Asp-rich carboxy-terminal domain, 2                                                                                     | -1.5484288                      |
| 240686_x_at  | 7037              | TFRC         | Transferrin receptor (p90, CD71)                                                                                                                                      | -1.3732147                      |
| 227287_at    | 10370             | CITED2       | Cbp/p300-interacting transactivator, with Glu/Asp-rich carboxy-terminal domain, 2                                                                                     | -1.3662235                      |
| 214063_s_at  | 7018              | TF           | transferrin                                                                                                                                                           | -1.3574413                      |
| 210339_s_at  | 3817              | KLK2         | kallikrein-related peptidase 2                                                                                                                                        | -1.3396232                      |
| 229696_at    | 2235              | FECH         | ferrochelataase (protoporphyrin)                                                                                                                                      | -1.3353684                      |
| 209855_s_at  | 3817              | KLK2         | kallikrein-related peptidase 2                                                                                                                                        | -1.3153344                      |
| 209993_at    | 5243              | ABCB1        | ATP-binding cassette, sub-family B (MDR/TAP), member 1                                                                                                                | -1.3139685                      |
| 216889_s_at  | 3172              | HNF4A        | hepatocyte nuclear factor 4, alpha                                                                                                                                    | -1.3042924                      |
| 225572_at    | 1385              | CREB1        | cAMP responsive element binding protein 1                                                                                                                             | -1.2900627                      |
| 204363_at    | 2152              | F3           | coagulation factor III (thromboplastin, tissue factor)                                                                                                                | -1.282241                       |
| 1553994_at   | 4907              | NT5E         | 5'-nucleotidase, ecto (CD73)                                                                                                                                          | -1.2564079                      |
| 205302_at    | 3484              | IGFBP1       | insulin-like growth factor binding protein 1                                                                                                                          | -1.248457                       |
| 1562772_a_at | 199699            | DAND5        | DAN domain family, member 5                                                                                                                                           | -1.2480234                      |
| 1552760_at   | 9734              | HDAC9        | histone deacetylase 9                                                                                                                                                 | -1.2195429                      |
| 227486_at    | 4907              | NT5E         | 5'-nucleotidase, ecto (CD73)                                                                                                                                          | -1.2169946                      |
| 207092_at    | 3952              | LEP          | leptin                                                                                                                                                                | -1.2151341                      |
| 201808_s_at  | 2022              | ENG          | endoglin                                                                                                                                                              | -1.2010849                      |
| 209854_s_at  | 3817              | KLK2         | kallikrein-related peptidase 2                                                                                                                                        | -1.1919341                      |
| 204614_at    | 5055              | SERPINB2     | serpin peptidase inhibitor, clade B (ovalbumin), member 2                                                                                                             | -1.1868457                      |
| 237289_at    | 1385              | CREB1        | cAMP responsive element binding protein 1                                                                                                                             | -1.1859214                      |

|              |                    |                       |                                                                                                                                              |            |
|--------------|--------------------|-----------------------|----------------------------------------------------------------------------------------------------------------------------------------------|------------|
| 214851_at    | 3172               | HNF4A                 | hepatocyte nuclear factor 4, alpha                                                                                                           | -1.1857752 |
| 214064_at    | 7018               | TF                    | transferrin                                                                                                                                  | -1.1743478 |
| 209201_x_at  | 7852               | CXCR4                 | chemokine (C-X-C motif) receptor 4                                                                                                           | -1.1623725 |
| 220699_s_at  | 3796               | KIF2A                 | kinesin heavy chain member 2A                                                                                                                | -1.1530087 |
| 207257_at    | 2056               | EPO                   | erythropoietin                                                                                                                               | -1.1523873 |
| 1555545_at   | 3817               | KLK2                  | kallikrein-related peptidase 2                                                                                                               | -1.1520905 |
| 218780_at    | 29911              | HOOK2                 | hook homolog 2 (Drosophila)                                                                                                                  | -1.1483543 |
| 216236_s_at  | 144195 ///<br>6515 | SLC2A14 ///<br>SLC2A3 | solute carrier family 2 (facilitated glucose transporter), member 14 /// solute carrier family 2 (facilitated glucose transporter), member 3 | -1.1464573 |
| 201849_at    | 664                | BNIP3                 | BCL2/adenovirus E1B 19kDa interacting protein 3                                                                                              | -1.1416852 |
| 231289_at    | 8648               | NCOA1                 | Nuclear receptor coactivator 1                                                                                                               | -1.140602  |
| 219232_s_at  | 112399             | EGLN3                 | egl nine homolog 3 (C. elegans)                                                                                                              | -1.1298956 |
| 1557767_at   | 339345             | NANOS2                | nanos homolog 2 (Drosophila)                                                                                                                 | -1.1275516 |
| 207980_s_at  | 10370              | CITED2                | Cbp/p300-interacting transactivator, with Glu/Asp-rich carboxy-terminal domain, 2                                                            | -1.121847  |
| 211919_s_at  | 7852               | CXCR4                 | chemokine (C-X-C motif) receptor 4                                                                                                           | -1.1191201 |
| 227253_at    | 1356               | CP                    | ceruloplasmin (ferroxidase)                                                                                                                  | -1.1169267 |
| 207954_at    | 2624               | GATA2                 | GATA binding protein 2                                                                                                                       | -1.1134421 |
| 214627_at    | 8288               | EPX                   | eosinophil peroxidase                                                                                                                        | -1.1092505 |
| 218995_s_at  | 1906               | EDN1                  | endothelin 1                                                                                                                                 | -1.1078447 |
| 222802_at    | 1906               | EDN1                  | endothelin 1                                                                                                                                 | -1.1063744 |
| 1555271_a_at | 7015               | TERT                  | telomerase reverse transcriptase                                                                                                             | -1.103513  |
| 230914_at    | 3172               | HNF4A                 | hepatocyte nuclear factor 4, alpha                                                                                                           | -1.1001208 |
| 215605_at    | 10499              | NCOA2                 | Nuclear receptor coactivator 2                                                                                                               | -1.0969359 |
| 222847_s_at  | 112399             | EGLN3                 | egl nine homolog 3 (C. elegans)                                                                                                              | -1.0962088 |
| 223185_s_at  | 79365              | BHLHE41               | basic helix-loop-helix family, member e41                                                                                                    | -1.0951428 |
| 215895_x_at  | 123                | ADFP                  | Adipose differentiation-related protein                                                                                                      | -1.0905755 |
| 202499_s_at  | 6515               | SLC2A3                | solute carrier family 2 (facilitated glucose transporter), member 3                                                                          | -1.090524  |
| 203087_s_at  | 3796               | KIF2A                 | kinesin heavy chain member 2A                                                                                                                | -1.0882703 |
| 209710_at    | 2624               | GATA2                 | GATA binding protein 2                                                                                                                       | -1.0865287 |
| 217028_at    | 7852               | CXCR4                 | chemokine (C-X-C motif) receptor 4                                                                                                           | -1.0840257 |
| 208691_at    | 7037               | TFRC                  | transferrin receptor (p90, CD71)                                                                                                             | -1.0810788 |
| 223045_at    | 54583              | EGLN1                 | egl nine homolog 1 (C. elegans)                                                                                                              | -1.0809251 |
| 210037_s_at  | 4843               | NOS2                  | nitric oxide synthase 2, inducible                                                                                                           | -1.0804086 |

|             |       |         |                                                                                         |            |
|-------------|-------|---------|-----------------------------------------------------------------------------------------|------------|
| 221497_x_at | 54583 | EGLN1   | egl nine homolog 1 (C. elegans)                                                         | -1.0781691 |
| 1552758_at  | 9734  | HDAC9   | histone deacetylase 9                                                                   | -1.0753318 |
| 221530_s_at | 79365 | BHLHE41 | basic helix-loop-helix family, member e41                                               | -1.0730112 |
| 205199_at   | 768   | CA9     | carbonic anhydrase IX                                                                   | -1.0660888 |
| 223046_at   | 54583 | EGLN1   | egl nine homolog 1 (C. elegans)                                                         | -1.0584486 |
| 200798_x_at | 4170  | MCL1    | myeloid cell leukemia sequence 1 (BCL2-related)                                         | -1.0556494 |
| 200063_s_at | 4869  | NPM1    | nucleophosmin (nucleolar phosphoprotein B23, numatrin)                                  | -1.052182  |
| 208429_x_at | 3172  | HNF4A   | hepatocyte nuclear factor 4, alpha                                                      | -1.0472476 |
| 220109_at   | 7018  | TF      | transferrin                                                                             | -1.0468187 |
| 202497_x_at | 6515  | SLC2A3  | solute carrier family 2 (facilitated glucose transporter), member 3                     | -1.0393608 |
| 211167_s_at | 2645  | GCK     | glucokinase (hexokinase 4)                                                              | -1.0314964 |
| 214447_at   | 2113  | ETS1    | v-ets erythroblastosis virus E26 oncogene homolog 1 (avian)                             | -1.0305674 |
| 212960_at   | 23158 | TBC1D9  | TBC1 domain family, member 9 (with GRAM domain)                                         | -1.0294185 |
| 208257_x_at | 5669  | PSG1    | pregnancy specific beta-1-glycoprotein 1                                                | -1.0293937 |
| 224760_at   | 6667  | SP1     | Sp1 transcription factor                                                                | -1.027211  |
| 227068_at   | 5230  | PGK1    | phosphoglycerate kinase 1                                                               | -1.0267615 |
| 203086_at   | 3796  | KIF2A   | kinesin heavy chain member 2A                                                           | -1.025402  |
| 220781_at   | 50514 | 1-Dec   | deleted in esophageal cancer 1                                                          | -1.0191693 |
| 210196_s_at | 5669  | PSG1    | pregnancy specific beta-1-glycoprotein 1                                                | -1.0178912 |
| 207248_at   | 3739  | KCNA4   | potassium voltage-gated channel, shaker-related subfamily, member 4                     | -1.0135952 |
| 203400_s_at | 7018  | TF      | transferrin                                                                             | -1.0125097 |
| 231242_at   | 79365 | BHLHE41 | basic helix-loop-helix family, member e41                                               | -1.011511  |
| 1564630_at  | 1906  | EDN1    | endothelin 1                                                                            | -1.0096291 |
| 211065_x_at | 5211  | PFKL    | phosphofructokinase, liver                                                              | -1.0072786 |
| 200989_at   | 3091  | HIF1A   | hypoxia inducible factor 1, alpha subunit (basic helix-loop-helix transcription factor) | -1.0047402 |
| 240258_at   | 2023  | ENO1    | enolase 1, (alpha)                                                                      | -1.0030315 |
| 221923_s_at | 4869  | NPM1    | nucleophosmin (nucleolar phosphoprotein B23, numatrin)                                  | 1.0064886  |
| 210195_s_at | 5669  | PSG1    | pregnancy specific beta-1-glycoprotein 1                                                | 1.0065022  |
| 237989_at   | 3484  | IGFBP1  | Insulin-like growth factor binding protein 1                                            | 1.0085517  |
| 224833_at   | 2113  | ETS1    | v-ets erythroblastosis virus E26 oncogene homolog 1 (avian)                             | 1.0094179  |
| 203116_s_at | 2235  | FECH    | ferrochelataase (protoporphyrin)                                                        | 1.0105138  |
| 217937_s_at | 51564 | HDAC7   | histone deacetylase 7                                                                   | 1.0113428  |
| 200738_s_at | 5230  | PGK1    | phosphoglycerate kinase 1                                                               | 1.0162836  |

|              |       |          |                                                                                               |           |
|--------------|-------|----------|-----------------------------------------------------------------------------------------------|-----------|
| 204314_s_at  | 1385  | CREB1    | cAMP responsive element binding protein 1                                                     | 1.0233904 |
| 1558034_s_at | 1356  | CP       | ceruloplasmin (ferroxidase)                                                                   | 1.0262899 |
| 231243_s_at  | 79365 | BHLHE41  | basic helix-loop-helix family, member e41                                                     | 1.0264996 |
| 204623_at    | 7033  | TFF3     | trefoil factor 3 (intestinal)                                                                 | 1.0289187 |
| 234393_at    | 9734  | HDAC9    | histone deacetylase 9                                                                         | 1.0296928 |
| 200650_s_at  | 3939  | LDHA     | lactate dehydrogenase A                                                                       | 1.0350311 |
| 203115_at    | 2235  | FECH     | ferrochelatase (protoporphyrin)                                                               | 1.0350366 |
| 201945_at    | 5045  | FURIN    | furin (paired basic amino acid cleaving enzyme)                                               | 1.0365676 |
| 202628_s_at  | 5054  | SERPINE1 | serpin peptidase inhibitor, clade E (nexin, plasminogen activator inhibitor type 1), member 1 | 1.0406842 |
| 203939_at    | 4907  | NT5E     | 5'-nucleotidase, ecto (CD73)                                                                  | 1.0412441 |
| 205732_s_at  | 10499 | NCOA2    | nuclear receptor coactivator 2                                                                | 1.0413772 |
| 216699_s_at  | 3816  | KLK1     | kallikrein 1                                                                                  | 1.0421392 |
| 203665_at    | 3162  | HMOX1    | heme oxygenase (decycling) 1                                                                  | 1.0437062 |
| 201249_at    | 6513  | SLC2A1   | solute carrier family 2 (facilitated glucose transporter), member 1                           | 1.0468999 |
| 209735_at    | 9429  | ABCG2    | ATP-binding cassette, sub-family G (WHITE), member 2                                          | 1.0484571 |
| 201809_s_at  | 2022  | ENG      | endoglin                                                                                      | 1.0536443 |
| 200697_at    | 3098  | HK1      | hexokinase 1                                                                                  | 1.062044  |
| 200797_s_at  | 4170  | MCL1     | myeloid cell leukemia sequence 1 (BCL2-related)                                               | 1.0658728 |
| 224314_s_at  | 54583 | EGLN1    | egl nine homolog 1 (C. elegans)                                                               | 1.0662946 |
| 204313_s_at  | 1385  | CREB1    | cAMP responsive element binding protein 1                                                     | 1.068598  |
| 209122_at    | 123   | ADFP     | adipose differentiation-related protein                                                       | 1.0808451 |
| 201169_s_at  | 8553  | BHLHE40  | basic helix-loop-helix family, member e40                                                     | 1.0837573 |
| 209106_at    | 8648  | NCOA1    | nuclear receptor coactivator 1                                                                | 1.0845438 |
| 214057_at    | 4170  | MCL1     | Myeloid cell leukemia sequence 1 (BCL2-related)                                               | 1.0850769 |
| 204846_at    | 1356  | CP       | ceruloplasmin (ferroxidase)                                                                   | 1.1007975 |
| 1568765_at   | 5054  | SERPINE1 | serpin peptidase inhibitor, clade E (nexin, plasminogen activator inhibitor type 1), member 1 | 1.1012657 |
| 243951_at    | 5243  | ABCB1    | ATP-binding cassette, sub-family B (MDR/TAP), member 1                                        | 1.1022251 |
| 201968_s_at  | 5236  | PGM1     | phosphoglucomutase 1                                                                          | 1.1035419 |
| 236326_at    | 51564 | HDAC7    | histone deacetylase 7                                                                         | 1.1075935 |
| 237214_at    | 7037  | TFRC     | transferrin receptor (p90, CD71)                                                              | 1.1120296 |
| 221691_x_at  | 4869  | NPM1     | nucleophosmin (nucleolar phosphoprotein B23, numatrin)                                        | 1.1123724 |
| 200632_s_at  | 10397 | NDRG1    | N-myc downstream regulated 1                                                                  | 1.1180332 |
| 214832_at    | 3172  | HNF4A    | hepatocyte nuclear factor 4, alpha                                                            | 1.1214911 |

|              |                    |                       |                                                                                                                                              |           |
|--------------|--------------------|-----------------------|----------------------------------------------------------------------------------------------------------------------------------------------|-----------|
| 217254_s_at  | 2056               | EPO                   | erythropoietin                                                                                                                               | 1.123006  |
| 1553685_s_at | 6667               | SP1                   | Sp1 transcription factor                                                                                                                     | 1.13211   |
| 224754_at    | 6667               | SP1                   | Sp1 transcription factor                                                                                                                     | 1.1358296 |
| 200966_x_at  | 226                | ALDOA                 | aldolase A, fructose-bisphosphate                                                                                                            | 1.1371278 |
| 207199_at    | 7015               | TERT                  | telomerase reverse transcriptase                                                                                                             | 1.1453434 |
| 228143_at    | 1356               | CP                    | ceruloplasmin (ferroxidase)                                                                                                                  | 1.1616286 |
| 200737_at    | 5230               | PGK1                  | phosphoglycerate kinase 1                                                                                                                    | 1.1633034 |
| 222088_s_at  | 144195 ///<br>6515 | SLC2A14 ///<br>SLC2A3 | solute carrier family 2 (facilitated glucose transporter), member 14 /// solute carrier family 2 (facilitated glucose transporter), member 3 | 1.1638811 |
| 206762_at    | 3741               | KCNA5                 | potassium voltage-gated channel, shaker-related subfamily, member 5                                                                          | 1.1683596 |
| 1555355_a_at | 2113               | ETS1                  | v-ets erythroblastosis virus E26 oncogene homolog 1 (avian)                                                                                  | 1.1701068 |
| 222305_at    | 3099               | HK2                   | hexokinase 2                                                                                                                                 | 1.1713105 |
| 201231_s_at  | 2023               | ENO1                  | enolase 1, (alpha)                                                                                                                           | 1.1717287 |
| 225792_at    | 51361              | HOOK1                 | hook homolog 1 (Drosophila)                                                                                                                  | 1.1806787 |
| 214687_x_at  | 226                | ALDOA                 | aldolase A, fructose-bisphosphate                                                                                                            | 1.1819047 |
| 209994_s_at  | 5243 ///<br>5244   | ABCB1 ///<br>ABCB4    | ATP-binding cassette, sub-family B (MDR/TAP), member 1 /// ATP-binding cassette, sub-family B (MDR/TAP), member 4                            | 1.195921  |
| 214513_s_at  | 1385               | CREB1                 | cAMP responsive element binding protein 1                                                                                                    | 1.2010753 |
| 201102_s_at  | 5211               | PFKL                  | phosphofructokinase, liver                                                                                                                   | 1.2024894 |
| 201170_s_at  | 8553               | BHLHE40               | basic helix-loop-helix family, member e40                                                                                                    | 1.2103281 |
| 204312_x_at  | 1385               | CREB1                 | cAMP responsive element binding protein 1                                                                                                    | 1.2107135 |
| 202627_s_at  | 5054               | SERPINE1              | serpin peptidase inhibitor, clade E (nexin, plasminogen activator inhibitor type 1), member 1                                                | 1.2130879 |
| 200796_s_at  | 4170               | MCL1                  | myeloid cell leukemia sequence 1 (BCL2-related)                                                                                              | 1.2147642 |
| 209105_at    | 8648               | NCOA1                 | nuclear receptor coactivator 1                                                                                                               | 1.2187158 |
| 202498_s_at  | 6515               | SLC2A3                | solute carrier family 2 (facilitated glucose transporter), member 3                                                                          | 1.2282293 |
| 217294_s_at  | 2023               | ENO1                  | enolase 1, (alpha)                                                                                                                           | 1.2282386 |
| 238996_x_at  | 226                | ALDOA                 | aldolase A, fructose-bisphosphate                                                                                                            | 1.2322649 |
| 217383_at    | 5230               | PGK1                  | Phosphoglycerate kinase 1                                                                                                                    | 1.2354189 |
| 201250_s_at  | 6513               | SLC2A1                | solute carrier family 2 (facilitated glucose transporter), member 1                                                                          | 1.2386923 |
| 1553995_a_at | 4907               | NT5E                  | 5'-nucleotidase, ecto (CD73)                                                                                                                 | 1.2567836 |
| 210249_s_at  | 8648               | NCOA1                 | nuclear receptor coactivator 1                                                                                                               | 1.2655433 |
| 212956_at    | 23158              | TBC1D9                | TBC1 domain family, member 9 (with GRAM domain)                                                                                              | 1.2659793 |

|             |       |        |                                                                   |           |
|-------------|-------|--------|-------------------------------------------------------------------|-----------|
| 225565_at   | 1385  | CREB1  | cAMP responsive element binding protein 1                         | 1.266063  |
| 209107_x_at | 8648  | NCOA1  | nuclear receptor coactivator 1                                    | 1.272025  |
| 207332_s_at | 7037  | TFRC   | transferrin receptor (p90, CD71)                                  | 1.2903928 |
| 201666_at   | 7076  | TIMP1  | TIMP metalloproteinase inhibitor 1                                | 1.2945762 |
| 201848_s_at | 664   | BNIP3  | BCL2/adenovirus E1B 19kDa interacting protein 3                   | 1.2957735 |
| 210358_x_at | 2624  | GATA2  | GATA binding protein 2                                            | 1.3303274 |
| 237215_s_at | 7037  | TFRC   | transferrin receptor (p90, CD71)                                  | 1.3456376 |
| 205731_s_at | 10499 | NCOA2  | nuclear receptor coactivator 2                                    | 1.366479  |
| 217356_s_at | 5230  | PGK1   | phosphoglycerate kinase 1                                         | 1.3992506 |
| 219976_at   | 51361 | HOOK1  | hook homolog 1 (Drosophila)                                       | 1.4013871 |
| 204936_at   | 5871  | MAP4K2 | mitogen-activated protein kinase kinase kinase kinase 2           | 1.4171062 |
| 214732_at   | 6667  | SP1    | Sp1 transcription factor                                          | 1.4419993 |
| 202934_at   | 3099  | HK2    | hexokinase 2                                                      | 1.4473424 |
| 214056_at   | 4170  | MCL1   | Myeloid cell leukemia sequence 1 (BCL2-related)                   | 1.5460784 |
| 207163_s_at | 207   | AKT1   | v-akt murine thymoma viral oncogene homolog 1                     | 1.5837299 |
| 201251_at   | 5315  | PKM2   | pyruvate kinase, muscle                                           | 1.6623838 |
| 202912_at   | 133   | ADM    | adrenomedullin                                                    | 1.7207075 |
| 202464_s_at | 5209  | PFKFB3 | 6-phosphofructo-2-kinase/fructose-2,6-biphosphatase 3             | 2.0838382 |
| 209687_at   | 6387  | CXCL12 | chemokine (C-X-C motif) ligand 12 (stromal cell-derived factor 1) | 3.5812628 |
| 203666_at   | 6387  | CXCL12 | chemokine (C-X-C motif) ligand 12 (stromal cell-derived factor 1) | 7.6760893 |
