# Supplementary material
Source: PubMed Central journal article supplement (PMC5527892)
Supplement: MOL2-4-135-s011.pdf [file MOL2-4-135-s011.pdf]

**Supplemental Table 4: HIF1 $\alpha$  Transcription Network MDA-MB-231 cells**

| Probe Set ID | Entrez Gene       | Gene Symbol  | Gene Title                                                                                                                                                      | Fold change [TESTOBSA] vs [ctr] |
|--------------|-------------------|--------------|-----------------------------------------------------------------------------------------------------------------------------------------------------------------|---------------------------------|
| 201566_x_at  | 3398              | ID2          | inhibitor of DNA binding 2, dominant negative helix-loop-helix protein                                                                                          | -3.6294038                      |
| 201565_s_at  | 3398              | ID2          | inhibitor of DNA binding 2, dominant negative helix-loop-helix protein                                                                                          | -3.557517                       |
| 213931_at    | 3398 ///<br>84099 | ID2 /// ID2B | inhibitor of DNA binding 2, dominant negative helix-loop-helix protein /// inhibitor of DNA binding 2B, dominant negative helix-loop-helix protein (pseudogene) | -2.8388672                      |
| 222847_s_at  | 112399            | EGLN3        | egl nine homolog 3 (C. elegans)                                                                                                                                 | -2.083398                       |
| 202912_at    | 133               | ADM          | adrenomedullin                                                                                                                                                  | -1.8566945                      |
| 204846_at    | 1356              | CP           | ceruloplasmin (ferroxidase)                                                                                                                                     | -1.6275297                      |
| 222802_at    | 1906              | EDN1         | endothelin 1                                                                                                                                                    | -1.5992546                      |
| 206762_at    | 3741              | KCNA5        | potassium voltage-gated channel, shaker-related subfamily, member 5                                                                                             | -1.5899996                      |
| 205731_s_at  | 10499             | NCOA2        | nuclear receptor coactivator 2                                                                                                                                  | -1.5696424                      |
| 1564630_at   | 1906              | EDN1         | endothelin 1                                                                                                                                                    | -1.5243753                      |
| 219232_s_at  | 112399            | EGLN3        | egl nine homolog 3 (C. elegans)                                                                                                                                 | -1.5158372                      |
| 225565_at    | 1385              | CREB1        | cAMP responsive element binding protein 1                                                                                                                       | -1.500526                       |
| 209710_at    | 2624              | GATA2        | GATA binding protein 2                                                                                                                                          | -1.4291306                      |
| 234393_at    | 9734              | HDAC9        | histone deacetylase 9                                                                                                                                           | -1.407431                       |
| 203939_at    | 4907              | NT5E         | 5'-nucleotidase, ecto (CD73)                                                                                                                                    | -1.3898883                      |
| 214851_at    | 3172              | HNF4A        | hepatocyte nuclear factor 4, alpha                                                                                                                              | -1.3853917                      |
| 214627_at    | 8288              | EPX          | eosinophil peroxidase                                                                                                                                           | -1.3474743                      |
| 202498_s_at  | 6515              | SLC2A3       | solute carrier family 2 (facilitated glucose transporter), member 3                                                                                             | -1.3215501                      |
| 237214_at    | 7037              | TFRC         | transferrin receptor (p90, CD71)                                                                                                                                | -1.3214285                      |
| 202497_x_at  | 6515              | SLC2A3       | solute carrier family 2 (facilitated glucose transporter), member 3                                                                                             | -1.3155844                      |
| 218995_s_at  | 1906              | EDN1         | endothelin 1                                                                                                                                                    | -1.291649                       |
| 1555271_a_at | 7015              | TERT         | telomerase reverse transcriptase                                                                                                                                | -1.2866004                      |
| 207954_at    | 2624              | GATA2        | GATA binding protein 2                                                                                                                                          | -1.2858471                      |

|              |       |          |                                                                                               |            |
|--------------|-------|----------|-----------------------------------------------------------------------------------------------|------------|
| 202627_s_at  | 5054  | SERPINE1 | serpin peptidase inhibitor, clade E (nexin, plasminogen activator inhibitor type 1), member 1 | -1.2395127 |
| 219976_at    | 51361 | HOOK1    | hook homolog 1 (Drosophila)                                                                   | -1.2377853 |
| 230914_at    | 3172  | HNF4A    | hepatocyte nuclear factor 4, alpha                                                            | -1.2355442 |
| 203665_at    | 3162  | HMOX1    | heme oxygenase (decycling) 1                                                                  | -1.2346776 |
| 201945_at    | 5045  | FURIN    | furin (paired basic amino acid cleaving enzyme)                                               | -1.2237169 |
| 204313_s_at  | 1385  | CREB1    | cAMP responsive element binding protein 1                                                     | -1.2217959 |
| 240686_x_at  | 7037  | TFRC     | Transferrin receptor (p90, CD71)                                                              | -1.2163967 |
| 231243_s_at  | 79365 | BHLHE41  | basic helix-loop-helix family, member e41                                                     | -1.2107071 |
| 207248_at    | 3739  | KCNA4    | potassium voltage-gated channel, shaker-related subfamily, member 4                           | -1.2044926 |
| 1553994_at   | 4907  | NT5E     | 5'-nucleotidase, ecto (CD73)                                                                  | -1.2019454 |
| 220699_s_at  | 3796  | KIF2A    | kinesin heavy chain member 2A                                                                 | -1.200732  |
| 212960_at    | 23158 | TBC1D9   | TBC1 domain family, member 9 (with GRAM domain)                                               | -1.181557  |
| 223185_s_at  | 79365 | BHLHE41  | basic helix-loop-helix family, member e41                                                     | -1.173236  |
| 202628_s_at  | 5054  | SERPINE1 | serpin peptidase inhibitor, clade E (nexin, plasminogen activator inhibitor type 1), member 1 | -1.1716428 |
| 203116_s_at  | 2235  | FECH     | ferrochelatase (protoporphyrin)                                                               | -1.169671  |
| 209122_at    | 123   | ADFP     | adipose differentiation-related protein                                                       | -1.1547668 |
| 1555545_at   | 3817  | KLK2     | kallikrein-related peptidase 2                                                                | -1.1527464 |
| 212956_at    | 23158 | TBC1D9   | TBC1 domain family, member 9 (with GRAM domain)                                               | -1.1387969 |
| 201809_s_at  | 2022  | ENG      | endoglin                                                                                      | -1.133899  |
| 220781_at    | 50514 | 1-Dec    | deleted in esophageal cancer 1                                                                | -1.1320648 |
| 201169_s_at  | 8553  | BHLHE40  | basic helix-loop-helix family, member e40                                                     | -1.1311287 |
| 216699_s_at  | 3816  | KLK1     | kallikrein 1                                                                                  | -1.1300423 |
| 210358_x_at  | 2624  | GATA2    | GATA binding protein 2                                                                        | -1.1262178 |
| 1553995_a_at | 4907  | NT5E     | 5'-nucleotidase, ecto (CD73)                                                                  | -1.1234459 |
| 224760_at    | 6667  | SP1      | Sp1 transcription factor                                                                      | -1.1233953 |
| 209735_at    | 9429  | ABCG2    | ATP-binding cassette, sub-family G (WHITE), member 2                                          | -1.1137159 |
| 225572_at    | 1385  | CREB1    | cAMP responsive element binding protein 1                                                     | -1.1089071 |
| 238996_x_at  | 226   | ALDOA    | aldolase A, fructose-bisphosphate                                                             | -1.1087304 |
| 204314_s_at  | 1385  | CREB1    | cAMP responsive element binding protein 1                                                     | -1.1022208 |
| 204936_at    | 5871  | MAP4K2   | mitogen-activated protein kinase kinase kinase kinase 2                                       | -1.09786   |
| 209107_x_at  | 8648  | NCOA1    | nuclear receptor coactivator 1                                                                | -1.0908791 |
| 215605_at    | 10499 | NCOA2    | Nuclear receptor coactivator 2                                                                | -1.0776988 |

|              |        |         |                                                                                   |            |
|--------------|--------|---------|-----------------------------------------------------------------------------------|------------|
| 204363_at    | 2152   | F3      | coagulation factor III (thromboplastin, tissue factor)                            | -1.076899  |
| 214687_x_at  | 226    | ALDOA   | aldolase A, fructose-bisphosphate                                                 | -1.0759214 |
| 205199_at    | 768    | CA9     | carbonic anhydrase IX                                                             | -1.0752246 |
| 209106_at    | 8648   | NCOA1   | nuclear receptor coactivator 1                                                    | -1.0692192 |
| 224314_s_at  | 54583  | EGLN1   | egl nine homolog 1 (C. elegans)                                                   | -1.0685858 |
| 1555355_a_at | 2113   | ETS1    | v-ets erythroblastosis virus E26 oncogene homolog 1 (avian)                       | -1.0643135 |
| 200966_x_at  | 226    | ALDOA   | aldolase A, fructose-bisphosphate                                                 | -1.0625931 |
| 201170_s_at  | 8553   | BHLHE40 | basic helix-loop-helix family, member e40                                         | -1.0615681 |
| 214832_at    | 3172   | HNF4A   | hepatocyte nuclear factor 4, alpha                                                | -1.0615077 |
| 208429_x_at  | 3172   | HNF4A   | hepatocyte nuclear factor 4, alpha                                                | -1.0609713 |
| 200797_s_at  | 4170   | MCL1    | myeloid cell leukemia sequence 1 (BCL2-related)                                   | -1.0547091 |
| 200650_s_at  | 3939   | LDHA    | lactate dehydrogenase A                                                           | -1.0532752 |
| 216889_s_at  | 3172   | HNF4A   | hepatocyte nuclear factor 4, alpha                                                | -1.0519633 |
| 214447_at    | 2113   | ETS1    | v-ets erythroblastosis virus E26 oncogene homolog 1 (avian)                       | -1.0513897 |
| 221497_x_at  | 54583  | EGLN1   | egl nine homolog 1 (C. elegans)                                                   | -1.0483209 |
| 217937_s_at  | 51564  | HDAC7   | histone deacetylase 7                                                             | -1.0332581 |
| 237989_at    | 3484   | IGFBP1  | Insulin-like growth factor binding protein 1                                      | -1.0320841 |
| 210196_s_at  | 5669   | PSG1    | pregnancy specific beta-1-glycoprotein 1                                          | -1.03071   |
| 209855_s_at  | 3817   | KLK2    | kallikrein-related peptidase 2                                                    | -1.0274837 |
| 209105_at    | 8648   | NCOA1   | nuclear receptor coactivator 1                                                    | -1.0239995 |
| 200798_x_at  | 4170   | MCL1    | myeloid cell leukemia sequence 1 (BCL2-related)                                   | -1.0229772 |
| 1558034_s_at | 1356   | CP      | ceruloplasmin (ferroxidase)                                                       | -1.0228581 |
| 231242_at    | 79365  | BHLHE41 | basic helix-loop-helix family, member e41                                         | -1.0176404 |
| 207980_s_at  | 10370  | CITED2  | Cbp/p300-interacting transactivator, with Glu/Asp-rich carboxy-terminal domain, 2 | -1.0171673 |
| 236326_at    | 51564  | HDAC7   | histone deacetylase 7                                                             | -1.0104475 |
| 223045_at    | 54583  | EGLN1   | egl nine homolog 1 (C. elegans)                                                   | -1.0093609 |
| 201849_at    | 664    | BNIP3   | BCL2/adenovirus E1B 19kDa interacting protein 3                                   | -1.0077415 |
| 205732_s_at  | 10499  | NCOA2   | nuclear receptor coactivator 2                                                    | -1.0070568 |
| 200063_s_at  | 4869   | NPM1    | nucleophosmin (nucleolar phosphoprotein B23, numatrin)                            | -1.0052584 |
| 240258_at    | 2023   | ENO1    | enolase 1, (alpha)                                                                | 1.0007936  |
| 201968_s_at  | 5236   | PGM1    | phosphoglucomutase 1                                                              | 1.000862   |
| 1562772_a_at | 199699 | DAND5   | DAN domain family, member 5                                                       | 1.0018566  |
| 201808_s_at  | 2022   | ENG     | endoglin                                                                          | 1.0061027  |
| 201231_s_at  | 2023   | ENO1    | enolase 1, (alpha)                                                                | 1.0062191  |

|             |                    |                       |                                                                                                                                              |           |
|-------------|--------------------|-----------------------|----------------------------------------------------------------------------------------------------------------------------------------------|-----------|
| 224754_at   | 6667               | SP1                   | Sp1 transcription factor                                                                                                                     | 1.0063834 |
| 1568765_at  | 5054               | SERPINE1              | serpin peptidase inhibitor, clade E (nexin, plasminogen activator inhibitor type 1), member 1                                                | 1.0099497 |
| 237289_at   | 1385               | CREB1                 | cAMP responsive element binding protein 1                                                                                                    | 1.0105646 |
| 205659_at   | 9734               | HDAC9                 | histone deacetylase 9                                                                                                                        | 1.0131183 |
| 205302_at   | 3484               | IGFBP1                | insulin-like growth factor binding protein 1                                                                                                 | 1.0138234 |
| 216236_s_at | 144195<br>/// 6515 | SLC2A14 ///<br>SLC2A3 | solute carrier family 2 (facilitated glucose transporter), member 14 /// solute carrier family 2 (facilitated glucose transporter), member 3 | 1.0153099 |
| 210339_s_at | 3817               | KLK2                  | kallikrein-related peptidase 2                                                                                                               | 1.0163186 |
| 215895_x_at | 123                | ADFP                  | Adipose differentiation-related protein                                                                                                      | 1.0166261 |
| 201251_at   | 5315               | PKM2                  | pyruvate kinase, muscle                                                                                                                      | 1.0169173 |
| 223046_at   | 54583              | EGLN1                 | egl nine homolog 1 (C. elegans)                                                                                                              | 1.0171412 |
| 211065_x_at | 5211               | PFKL                  | phosphofructokinase, liver                                                                                                                   | 1.0171843 |
| 214064_at   | 7018               | TF                    | transferrin                                                                                                                                  | 1.0173802 |
| 207199_at   | 7015               | TERT                  | telomerase reverse transcriptase                                                                                                             | 1.0215372 |
| 200738_s_at | 5230               | PGK1                  | phosphoglycerate kinase 1                                                                                                                    | 1.0237118 |
| 204312_x_at | 1385               | CREB1                 | cAMP responsive element binding protein 1                                                                                                    | 1.0300914 |
| 210037_s_at | 4843               | NOS2                  | nitric oxide synthase 2, inducible                                                                                                           | 1.0402746 |
| 243951_at   | 5243               | ABCB1                 | ATP-binding cassette, sub-family B (MDR/TAP), member 1                                                                                       | 1.0408525 |
| 228143_at   | 1356               | CP                    | ceruloplasmin (ferroxidase)                                                                                                                  | 1.0456961 |
| 210249_s_at | 8648               | NCOA1                 | nuclear receptor coactivator 1                                                                                                               | 1.0529021 |
| 201249_at   | 6513               | SLC2A1                | solute carrier family 2 (facilitated glucose transporter), member 1                                                                          | 1.0532192 |
| 229696_at   | 2235               | FECH                  | ferrochelataase (protoporphyrin)                                                                                                             | 1.054987  |
| 210195_s_at | 5669               | PSG1                  | pregnancy specific beta-1-glycoprotein 1                                                                                                     | 1.0642222 |
| 218780_at   | 29911              | HOOK2                 | hook homolog 2 (Drosophila)                                                                                                                  | 1.0697091 |
| 204614_at   | 5055               | SERPINB2              | serpin peptidase inhibitor, clade B (ovalbumin), member 2                                                                                    | 1.07219   |
| 217254_s_at | 2056               | EPO                   | erythropoietin                                                                                                                               | 1.0748111 |
| 201666_at   | 7076               | TIMP1                 | TIMP metalloproteinase inhibitor 1                                                                                                           | 1.0756689 |
| 214063_s_at | 7018               | TF                    | transferrin                                                                                                                                  | 1.0838027 |
| 220109_at   | 7018               | TF                    | transferrin                                                                                                                                  | 1.0864607 |
| 231289_at   | 8648               | NCOA1                 | Nuclear receptor coactivator 1                                                                                                               | 1.0924103 |
| 227486_at   | 4907               | NT5E                  | 5'-nucleotidase, ecto (CD73)                                                                                                                 | 1.093601  |

|              |                  |                    |                                                                                                                   |           |
|--------------|------------------|--------------------|-------------------------------------------------------------------------------------------------------------------|-----------|
| 209994_s_at  | 5243 ///<br>5244 | ABCB1 ///<br>ABCB4 | ATP-binding cassette, sub-family B (MDR/TAP), member 1 /// ATP-binding cassette, sub-family B (MDR/TAP), member 4 | 1.0951401 |
| 203400_s_at  | 7018             | TF                 | transferrin                                                                                                       | 1.0958467 |
| 201102_s_at  | 5211             | PFKL               | phosphofructokinase, liver                                                                                        | 1.0973499 |
| 200737_at    | 5230             | PGK1               | phosphoglycerate kinase 1                                                                                         | 1.1002378 |
| 204623_at    | 7033             | TFF3               | trefoil factor 3 (intestinal)                                                                                     | 1.100283  |
| 200697_at    | 3098             | HK1                | hexokinase 1                                                                                                      | 1.1057515 |
| 200632_s_at  | 10397            | NDRG1              | N-myc downstream regulated 1                                                                                      | 1.1065638 |
| 202499_s_at  | 6515             | SLC2A3             | solute carrier family 2 (facilitated glucose transporter), member 3                                               | 1.1116827 |
| 1552760_at   | 9734             | HDAC9              | histone deacetylase 9                                                                                             | 1.1146184 |
| 214513_s_at  | 1385             | CREB1              | cAMP responsive element binding protein 1                                                                         | 1.1165727 |
| 203115_at    | 2235             | FECH               | ferrochelatase (protoporphyrin)                                                                                   | 1.1211535 |
| 203086_at    | 3796             | KIF2A              | kinesin heavy chain member 2A                                                                                     | 1.1216097 |
| 221923_s_at  | 4869             | NPM1               | nucleophosmin (nucleolar phosphoprotein B23, numatrin)                                                            | 1.1316776 |
| 207163_s_at  | 207              | AKT1               | v-akt murine thymoma viral oncogene homolog 1                                                                     | 1.1331486 |
| 200796_s_at  | 4170             | MCL1               | myeloid cell leukemia sequence 1 (BCL2-related)                                                                   | 1.1336542 |
| 227253_at    | 1356             | CP                 | ceruloplasmin (ferroxidase)                                                                                       | 1.1357211 |
| 217356_s_at  | 5230             | PGK1               | phosphoglycerate kinase 1                                                                                         | 1.1374736 |
| 227068_at    | 5230             | PGK1               | phosphoglycerate kinase 1                                                                                         | 1.1419411 |
| 221691_x_at  | 4869             | NPM1               | nucleophosmin (nucleolar phosphoprotein B23, numatrin)                                                            | 1.1507427 |
| 209993_at    | 5243             | ABCB1              | ATP-binding cassette, sub-family B (MDR/TAP), member 1                                                            | 1.1520417 |
| 211919_s_at  | 7852             | CXCR4              | chemokine (C-X-C motif) receptor 4                                                                                | 1.1579211 |
| 209357_at    | 10370            | CITED2             | Cbp/p300-interacting transactivator, with Glu/Asp-rich carboxy-terminal domain, 2                                 | 1.1657605 |
| 200989_at    | 3091             | HIF1A              | hypoxia inducible factor 1, alpha subunit (basic helix-loop-helix transcription factor)                           | 1.1738228 |
| 203087_s_at  | 3796             | KIF2A              | kinesin heavy chain member 2A                                                                                     | 1.2000988 |
| 208691_at    | 7037             | TFRC               | transferrin receptor (p90, CD71)                                                                                  | 1.206864  |
| 1553685_s_at | 6667             | SP1                | Sp1 transcription factor                                                                                          | 1.2070156 |
| 225792_at    | 51361            | HOOK1              | hook homolog 1 (Drosophila)                                                                                       | 1.2207909 |
| 207092_at    | 3952             | LEP                | leptin                                                                                                            | 1.224764  |
| 209854_s_at  | 3817             | KLK2               | kallikrein-related peptidase 2                                                                                    | 1.2272387 |
| 224833_at    | 2113             | ETS1               | v-ets erythroblastosis virus E26 oncogene homolog 1 (avian)                                                       | 1.2327179 |

|             |                    |                       |                                                                                                                                              |           |
|-------------|--------------------|-----------------------|----------------------------------------------------------------------------------------------------------------------------------------------|-----------|
| 227287_at   | 10370              | CITED2                | Cbp/p300-interacting transactivator, with Glu/Asp-rich carboxy-terminal domain, 2                                                            | 1.2382772 |
| 207332_s_at | 7037               | TFRC                  | transferrin receptor (p90, CD71)                                                                                                             | 1.2389003 |
| 208257_x_at | 5669               | PSG1                  | pregnancy specific beta-1-glycoprotein 1                                                                                                     | 1.2477041 |
| 217383_at   | 5230               | PGK1                  | Phosphoglycerate kinase 1                                                                                                                    | 1.2493643 |
| 217294_s_at | 2023               | ENO1                  | enolase 1, (alpha)                                                                                                                           | 1.2579368 |
| 207257_at   | 2056               | EPO                   | erythropoietin                                                                                                                               | 1.2871163 |
| 221530_s_at | 79365              | BHLHE41               | basic helix-loop-helix family, member e41                                                                                                    | 1.2990471 |
| 1552758_at  | 9734               | HDAC9                 | histone deacetylase 9                                                                                                                        | 1.3079678 |
| 201848_s_at | 664                | BNIP3                 | BCL2/adenovirus E1B 19kDa interacting protein 3                                                                                              | 1.353647  |
| 217028_at   | 7852               | CXCR4                 | chemokine (C-X-C motif) receptor 4                                                                                                           | 1.3769138 |
| 202464_s_at | 5209               | PFKFB3                | 6-phosphofructo-2-kinase/fructose-2,6-biphosphatase 3                                                                                        | 1.3818449 |
| 1557767_at  | 339345             | NANOS2                | nanos homolog 2 (Drosophila)                                                                                                                 | 1.3932881 |
| 222305_at   | 3099               | HK2                   | hexokinase 2                                                                                                                                 | 1.4111394 |
| 214732_at   | 6667               | SP1                   | Sp1 transcription factor                                                                                                                     | 1.4579155 |
| 237215_s_at | 7037               | TFRC                  | transferrin receptor (p90, CD71)                                                                                                             | 1.4601676 |
| 209201_x_at | 7852               | CXCR4                 | chemokine (C-X-C motif) receptor 4                                                                                                           | 1.5021431 |
| 214057_at   | 4170               | MCL1                  | Myeloid cell leukemia sequence 1 (BCL2-related)                                                                                              | 1.5255699 |
| 201250_s_at | 6513               | SLC2A1                | solute carrier family 2 (facilitated glucose transporter), member 1                                                                          | 1.549635  |
| 211167_s_at | 2645               | GCK                   | glucokinase (hexokinase 4)                                                                                                                   | 1.6139727 |
| 222088_s_at | 144195<br>/// 6515 | SLC2A14 ///<br>SLC2A3 | solute carrier family 2 (facilitated glucose transporter), member 14 /// solute carrier family 2 (facilitated glucose transporter), member 3 | 1.6464121 |
| 214056_at   | 4170               | MCL1                  | Myeloid cell leukemia sequence 1 (BCL2-related)                                                                                              | 1.8768921 |
| 202934_at   | 3099               | HK2                   | hexokinase 2                                                                                                                                 | 1.9316821 |
| 209687_at   | 6387               | CXCL12                | chemokine (C-X-C motif) ligand 12 (stromal cell-derived factor 1)                                                                            | 3.698157  |
| 203666_at   | 6387               | CXCL12                | chemokine (C-X-C motif) ligand 12 (stromal cell-derived factor 1)                                                                            | 5.539212  |
