# Supplementary material
Source: PubMed Central journal article supplement (PMC5527892)

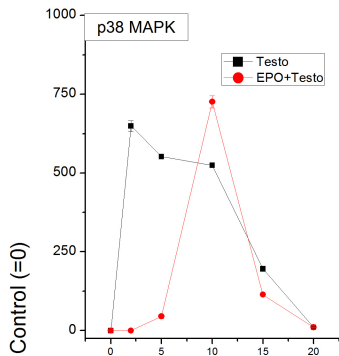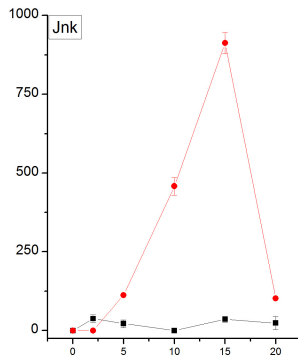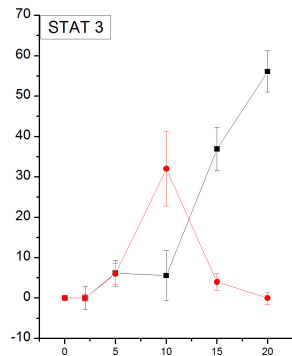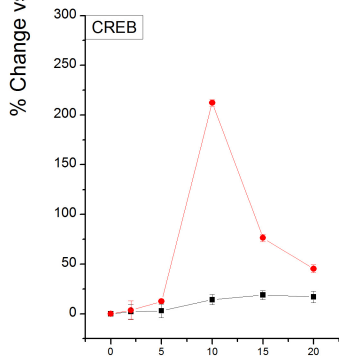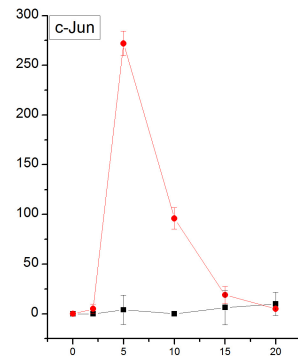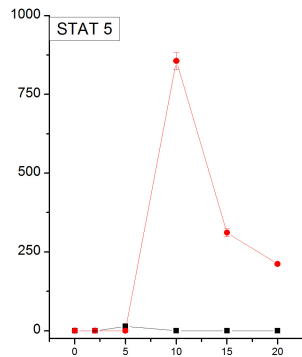

Time (min)

Supplement: MOL2-4-135-s006.pdf [file MOL2-4-135-s006.pdf]
